# Supplementary material
Source: PubMed Central journal article supplement (PMC11105112)
Supplement: 18_2020_3518_MOESM1_ESM.pdf [file 18_2020_3518_MOESM1_ESM.pdf]

# **Genome-wide analysis of CCHC-type zinc finger (ZCCHC) proteins in yeast, Arabidopsis, and humans**

## **Supplementary Figures**

Uri Aceituno-Valenzuela, Rosa Micol-Ponce, and María Rosa Ponce

Instituto de Bioingeniería, Universidad Miguel Hernández, Campus de Elche, 03202 Elche, Spain

Corresponding author:

María Rosa Ponce

email: [mrponce@umh.es](mailto:mrponce@umh.es)

**Air1; 1 CX<sub>2</sub>CX<sub>4</sub>HX<sub>4</sub>C and 3 CX<sub>2</sub>CX<sub>3</sub>GHX<sub>4</sub>C**

MSTLLSEVESIDTLPYVKDTPPTGSDSSSFNKL LAPSIEDVDANPEELRTLGRGQGRYFGITDYDSNGAIMEAEPK **CNNCSQRGHLKRN**  
PHVICTYCGFMDDHYSQHCPKAI **CTNCNANGHYKKSQC**PHKWKV **CTL CNSKRHSRERC**PSIWRSYLLKTKDTNQGFDFQTFV **CYNC**  
**ENAGHFDDC**AEGRSSRVPNTDGS AFCGDNLATKFKQHYFNQLKDYKREASQRQHFDNEHEFNLLDYEYND DAYDLP GSRTYRDKMKWK  
GKVQSTRNRNSNNRYESGNNRKKKSPFSAQNYKVTKNKRVQTHPLDFPRSSQNNRNTNDYSSQFSYNRDDFPKGPKNKRGRSSSNKSQR  
NGRY

**Air2; 1 CX<sub>2</sub>CX<sub>4</sub>HX<sub>4</sub>C and 3 CX<sub>2</sub>CX<sub>3</sub>GHX<sub>4</sub>C**

MEKNTAPFVVD TAPTPPDKLVAPSIIEVNSNPNELRALRGQGRYFGVSDDDKDAI KEAAPK **CNNCSQRGHLKDC**PHIICSYCGATDD  
HYSRHC PKAI **QCSKDEVGHYRSQC**PHKWKV **CTLCKSKKHSKERC**PSIWRAYILVDDNEKAKPKVLPFHTIY **CYNCGGKGHFDDCK**  
EKRSSRVPNEDGSAFTGSNLSVELKQEYRHMNRNSDENEDYQFSESIYDEDPLPRPSHKRHSQNDHSHSGRNKRASNFHPPPYQKSN  
VIQPTIRGETLSLNNNISKNRYQNTKVNVSISENMYGSRYNPSTYVDNNSISNSSNYRNYNSYQPYRSGTLGKRR

**Msi5/Bbp/Sf1; 1 CX<sub>2</sub>CX<sub>4</sub>HX<sub>4</sub>C and 1 CX<sub>2</sub>CX<sub>3</sub>GHX<sub>4</sub>C**

MSFRRINSRYFENRKGSSMEEKAKVPPNVNLSLWRKNTVESDVHRFNSLPSKISGALTREQIYSYQVMFRIQETITIKLRTNDFVPPSR  
KNRSPSPPPVYDAQGRKRTNTRQRYRKKLEDERIKLVEIALKTIPIYFVPPDDYKRPTKFDKYYIPVDQYPDVNFVGLLGPGRGRTLK  
LQEDSNCKIAIRGRGSVKEGKNASDLPPGAMNFEDPLHCLIIADSEDKIQGKIKVCQIVIKAVTSP EGQNDLKRQQLRELAE LNGTLR  
EDNR **CPICGLKDKRYDC**PNRKIPNIQIV **CKICGQTGHFSDC**NSSSQMSRFRDRNATVNNSAPIQSNDVHYSNTHPIQAPKRSRY  
DNNSTEPPLKFPASSRYAPSPSPASHISRQAQNVTPPPPGLTSSSFSSGVPGIAPPPLQSPPESEQPKFSLPPPMTTVQSSIAPP  
PGLSGPPGFSNNMGNDINKPTPPGLQGPPGL

**Bik1; 1 CX<sub>2</sub>CX<sub>3</sub>GHX<sub>4</sub>C**

MDRYQRKIGCFIQIPNLGRGQLKYVGPVDTKAGMFAVGVDLLANIGKNDGSMFGKKYFQTEY PQSGLFIQLQKVASLIEKASISQTSRRT  
TMEPLSIPKNSIVRLTNQFSPMDDPKSPTPMRSFRITSRHSGNQSSMDQEASDHHQQQEFYDNRDRMEVDSILSSDRKANHNNTSD  
WKPNDNGHMNDLNSSEVTIELREAQLTIEKLQRQLHYKRLDDQRMVLEEVQPTFDRYEATI QEREKEIDHLKQLELERRQQAQKQF  
FDAENEQLLAVVSQ LHEEIKENEERNLSHNQPTGANEDVELLKKQLEQLRNIEDQFELHKTWKAKEREQLKMHNDSLSKEYQNL SKELF  
LTKPQDSSSEEVASLTKKLEANEKIKQLEQAQAQTAVESLPIDFPAPVDTTAGRQW **CEHCDTMGHNTAEC**PHHNPNDQOFF

**Gis2; 1 CX<sub>2</sub>CX<sub>4</sub>HX<sub>4</sub>C and 6 CX<sub>2</sub>CX<sub>3</sub>GHX<sub>4</sub>C**

MSQKAC **CYVCGKIGHLAEDC**DSERL **CYCNKPGHVQTDCT**MPRTVEFKQ **CYNCGETGHRSEC**TVQR **CFCNCNQTGHISREC**PEPKKTSRF  
SKVS **CYKCGPNHMAKDC**MKEDGISGLKCYTCCQAQHMSRDC **QNDRL** **CYNCNETGHI**SKDCPKA

**Mpe1; 1 CX<sub>2</sub>CX<sub>4</sub>HX<sub>4</sub>C**

MSSTIFYRFSQRNTSRILFDGTGLTVFDLKREIIQENKLGDTDFOLKIYNPDTEEEYDDDAFVIPRSTSVIVKRS PAIKSFSVHSRL  
KGNVGAALGNATRYVTGRPRVLQKRQHTATTANVSGTTEEERIASMFATQENQWEQTQEEMSAATPVFFKSQTNKNSAQENEGPPP  
GYM **CYRCGGRDEHWKNC**PTNSDPNFEFGKRI RRTTGI PKKFLKSI EIDPETMPEEMAQRKIMITDEGKFFVQVEDKQSWEDYQRKREN  
QIDGDETIWRGHFKDLPDDLKCP LTGGLLRQVKT SKCCNIDFSKEALENALVESDFVCPNCE TRDILLDSLVPDQDKEKEVETFLKK  
QEELHGSSKDGQNPETKKMLMDPTGTAGLNNNTSLPTSVNNGGTPVPPVPLPFGIPPFPMFMPFMPPTATITNPHQADASPKK

**Slu7; 1 CX<sub>2</sub>CX<sub>3</sub>GHX<sub>4</sub>C**

MNNNSRNENRSTINRNRQLQQAKEKNENIHI PRYIRNQPWYKDTPKQE QEGKPGNDDTSTAEGGEKSDYLVHHRQKAKGGALDIDN  
NSEPKIGMGIKDEFKLRPQKMSVRD SHLSF **CRNCGEAGHKEKDC**MEKPRKMQLVLDLNSQKNNGTVLVRATDDWD SRKDRWYGYS  
GKEYNELISKWERDKRNKIKGDKSQTDETLWDTDEEIELMKLELYKDSVGLKDDADNSQLYRTSTRLREDKAYLNDINSTE SNYD  
PKSRLYKTE TLGAVDEKSKMFRRLHTGEGKLKLNELNQFARSHAKEMGIRDEIEDKEKVQHVLVANPTKYEYLKRRQEETKQPKIVSI  
GDLEARKVDGTKQSEEQRNHLKDLYG

**YOL029C; 1 CX<sub>2</sub>CX<sub>4</sub>HX<sub>4</sub>C**

MKPVTCCNQKNNIMPSLVPVCCSEKKIESDAKKSISKCCGDK EYDSENRPITKEDG SWIPGS **CKQCRSDPHSRNFC**QSLSNKCSSSF  
SSNSALSPDLNEQQTVDVNYNSIKLPEICSKNAQMNAA SDAKRYLPISYTYQKIRQHMQKNKSIQEQLNPEDSTSISSALENIASGLHV  
RGQKVELQSIKDALHKMDKNVLE

**Supplementary Figure 1.** Yeast ZCCHC domain-containing proteins. The number of CX<sub>2</sub>CX<sub>4</sub>HX<sub>4</sub>C or CX<sub>2</sub>CX<sub>3</sub>GHX<sub>4</sub>C sequences in each protein is shown; these sequences have been highlighted. A slash separates alternative names given by different authors to the same protein.

**AT5G51280 RH35; 1 CX<sub>2</sub>CX<sub>3</sub>GHX<sub>4</sub>C**

MESIMEEADSYIEYVSVAAERRAIAAQKILQKRGKASELEEEADKEKLAEEKPSLLVQATQLKRDVPEVSATEQIILQEKEMMEHLSDDK  
TILMSVRELAKGITYTEPLLTGWKPPHLIRKMSKQKQDLIRKQWHIIVNGDDIPPIKKNFKDMKFRPVLDTLKEKGIQVPTPIQVQGLP  
VILAGRDMIGIATYFSGKTLVFLVPMIMIALQEMMMPAAGEGPIGLIVCPSRELARQTYEVVEQFVAPLVEAGYPPLRSLLCIGGID  
MRSQLEVVKRGVHIIVVATPGRLKMDLAKKMSLDACRYLTLDEADRLVDLGFEDDIREVDFHFKSQRTLLFSATMPTKIQIFARSALV  
KPVTVNVGRAGAANLDVIOVEVEYVQKQAKIVYLLLECLQKTSPPVLIIFCENKADVDDIHEYLLLLKGV EAVA IHGGKDQEDREYAISSFKA  
GKKDVLVATDVASKGLDFDPIQHVINYDMPAEIENYVHRIGRTGRCGKTGIATTFINKNQSETLLDLKHLLEQAKQRIPPVLAELNDP  
MEEAETIANASGVKGCAYCGGLGHRIRDCPKLEHQKSVAISSNRKDYFGSGGYRGEI

**AT5G26742 RH3; 1 CX<sub>2</sub>CX<sub>3</sub>GHX<sub>4</sub>C**

MASTVGVPSLYQVPHLEISKPNKRSNCLSLSLDKPFFTPLSLVRTRRIHSSLLVPSAVATPNSVLSSEEAFKSLGLSDHDEYDLDG  
DNNNVEADDGEEAISKLSLPQRLEESLEKRGITHLFPQRAVLVLPALQGRDIARAKTGTGKTLAFGIPIIKRLTEEAGDYTAFFRRSG  
RLPKFLVLAPTRERAKQVEKEIKESAPYLSVTCVYGGVSYTIQQSALTRGVDVVVGTGPRIIDLIEGRSLKLGVEYLVLEADQMLAV  
GFEEAVESILENLPTRKQSMFLSATMPTWVKLARKYLDNPLNIDLVDGQDEKLAEGIKLYAIATTTSTKRTILSDLITVYAKGGKTIV  
FTQTKRDADEVSLALSNSIATEALHGDISQHQRETLNFRQKFTVLVATDVASRGDIIPNDVLIHYELPNDPETFVHRSRGTRGAG  
KEGSAILMHTSSQKRTVRSLEDRVGCHEFISPPVTGDLLESSADQVVATLNGVHPDSIKFFSATAQKLYEEKGTDALAAALAHLSGFS  
QPPSSRSLLSHEKGWVTLQLIRDPTNARGFLSARSVTGFLSDLYRTAADEVGKIFLIADRIQGAVEDLPEEIAKELLEKDVPEGNSLS  
MITKLPPLQDDGPPSSDNYGRFSSRDRMPRGGGSRGSRGGRGSSSRGRD SWGGDDDRGSRSSSGGSSWSRGGSSSRGSSD DDLIGRS  
SSSRAPSRERSFGGSCFICGKSGHRATDCPDKRGF

**AT4G33370 RH43; 1 CX<sub>2</sub>CX<sub>3</sub>GHX<sub>4</sub>C**

MEVDDGYVEYVPEERLAQMKRQVVEEPGKGMMEHLSDKKLMVSGELARGITYTEPLSTWVKPPLHVRKMSKQMDLIRKQWHITVNG  
EDIPPIKKNFMDMKFPSPILLRMLKDKGIMHPTPIQVQGLPVVLSGRDMIGIAFTGSGKTLVFLVPMIILALQEEIMMPIAAGEGPIALV  
ICPSRELAKQTYDVVEQFVASLVEDGYPRRLSLLCIGGVDMRSQLDVVKKGVHIIVVATPGRLKDI LAKKMSLDACRLLTLDEADRLVD  
LGFEDDIRHVFDFHFKSQRTLLFSATMPAKIQIFATSALVKPVTVNVGRAGAANLDVIOVEVEYVQKQAKIVYLLLECLQKTTTPVLI FCE  
NKADVDDIHEYLLLLKGV EAVA IHGGKDQEDRYAISL FKAGKDVVATDVASKGLDFDPIQHVINYDMPGEIENYVHRIGRTGRCGKT  
GIATTFINKNQSEITLLDLKHLLEQAKQRIPPVLAELNGPMEETETIANASGVKGCAYCGGLGHRILQCPKFEHQKSVAISSSRKDHFG  
SDGYRGEV

**AT4G36020 CSP1; 7 CX<sub>2</sub>CX<sub>3</sub>GHX<sub>4</sub>C**

MASEDQSAARSTGKVNWFNASKGYGFITPDDGSVELFVHQSSIVSEGYRSLTVGDAVEFAITQSDGKTKAVNV TAPGGGSLKKNNSR  
GNGARRGGGGGSCYNCCELGHI SKDCGIGGGGGGERRSRGEGCYNCGDTHGFARDCT SAGNGDQRGATKGGNDGCYTCGDVGHVARD  
CTQKSVNGDQRGAVKGGNDGCYTCGDVGHFARDCTQKVAAGNVRSGGGGSGTCYSCGGVGHVARDCA TKRQPSRCYQCGGSGHLARD  
CDQRGSGGGGNDNA CYKCKEGHFAREC SSSVA

**AT4G38680 CSP2/GRP2; 2 CX<sub>2</sub>CX<sub>3</sub>GHX<sub>4</sub>C**

MSGDNGGGERRKGSVKWFDTQKGFGFITPDDGGDDL FVHQSSIRSEGFRSLAAEEAVEFEVEIDNNNRPKAIDVSGPDGAPVQNSGGG  
SSGGRGGFGGGRRGSGGGYGGGGYGGRRGGGGGSDCYKCGEPGHMARDCEGGGGYGGGGGGYGGGGYGGGGGGYGGGGRRG  
GGGGGSCYSCGESGHFARDCTSGGR

**AT2G17870 CSP3/GRP2B; 7 CX<sub>2</sub>CX<sub>3</sub>GHX<sub>4</sub>C**

MAMEDQSAARSIGKVSWFSDGRGYGFITPDDGGEELFVHQSSIVSDGFRSLTLGESVEYEIALGSDGKTKAIEV TAPGGGSLNKKENSS  
RSGSGNCFNCGEVGHMAKDCDGGSGGKSFGGGGRRSGGEGCYMCGDVGHFARDCRQSGGGNSGGGGGGRRPCYSCGEVGHVARDCRG  
GSGGNRYGGGGRRSGGDGCYMCGEVGHFARDCRQNGGGNVGGGGSTCYTCGEVGHVARDCTSKI PGGGGGGRACYECGGTGHVARD  
DRRSGSSGGGGSNKCFICGKEGHFARECTSVA

**AT2G21060 CSP4/GRP2b; 2 CX<sub>2</sub>CX<sub>3</sub>GHX<sub>4</sub>C**

MSGGGDVNMSGDRRKGTVKWFDTQKGFGFITPDDGGDDL FVHQSSIRSEGFRSLAAEESVEFVDFVDNSGRPKAIEVSGPDGAPVQGN  
SGGGSSGRRGGFGGGRRGSGGGYGGGGYGGRRGGGGGDNCSFKCGEPGHMARECSQGGGGYSGGGGGRYGSGGGGGGGG  
GLSCYSCGESGHFARDCTSGGAR

**AT5G45400 RPA1C; 1 CX<sub>2</sub>CX<sub>4</sub>HX<sub>4</sub>C**

MAVSLTEGVVMKMLNGEVTSETDMMPVLVQVTELKLIQSKLHQNQESSNRKFLLSGDGTDLAAGMLNTSLNSLVNQGTIQLGSVIRLTHY  
ICNLIQTRRIVVIMQLEVIVEKCNIIIGNPKPEGHSSINPQRGGVNTQSNGGSEQQARRSDVNGGRYGVANSNPQPQVHNSDAGRYC  
VSANSNPQPQVHSSDAGRYGVANSNPQRQVHNSPDAGRYGQPVVSQRYGTGSGYPETSPSTRPYVSSNAGYGGSRDQPRAPTATTA  
YSRPVQSAYQPQPPMYVNRGPVARNEAPPRINPIAALNPYQGRWTIKVRVTSKADLRRFNNPRGEGKLFSDLLDADGGEIRVTCFND  
AVDQFFDKIVVGNVYLISRGNLPAQKNFNHLPNDYIEHLDSASTIQPCEDDGTIPRYHFHFRNIGDIENMENNSTTDVIGIVSSISPT  
VAIMRKNLTVQKRSLLQKDMSGRSVEVTMWGNFCNAEGQKLNLCDSGVFPVLALKAGRIGEFNGKQVSTIGASQFFIEPDFPEAREL  
RQWYEREGRNAHFTSISREFSGVGRQEVKVAIAQIKDEKLTSEKPDWITVCAITISFMKVENFCYTACPI MNGDRPCSKKVTNNGDGTW  
RCEKCDKCVDECDYRYILQIQLDHTDLTWATAFQEEIMGMSAKDLYYVYKYNQDEEKFEIIRSVAFTKYIFKLIKKEETYSDQ  
RVKATVVKAELNYSNTRFMLEAIDKLIKGDANSLPIKAESSNYSRDAFNSSVGTSGTRDTASVDARREFGLPAANQVQYGNQYSSD  
ARSLGGFTSNVCRSNSHVANSCTPLMSEPQGGYMGGTNAGGMPROHVGSY

**AT4G19130 RPA1E; 1 CX<sub>2</sub>CX<sub>3</sub>GHX<sub>4</sub>C**

MEVSLTAGAIGKIMNGEVTTEADMI PVLVQVTDLQVIMAQDPTREFRFVMSDGTYLHQGMLGTDLNNLVKEGTLQPGSIVRLTRFVGD

VIKRRIVIVPQLEVLKQISDIIGHVPPGGKHNDRGADSGIKFNTTEQQSGSIRQVNNIEPGRSNAAI SPQVGGTGSSVPASTTPSTR  
AYSNPSSDGGVTRQDYARDPPTSYPHQPPPPMYANRGPVARNEAPPKII PVNALSYPYSGRWTIKARVTNKAALKQYSNPRGEGKVFN  
FDLLDADNGEIRVTCFNNAVDFYDQIVVGNLYLISRGLSRPAQKFNHNLNDYEMLDNASTIKQCYEEDAAI PRHQFHFRTIGDIES  
MENNACIVDVIGIVSSISPTVTITRKNGTATPKRSLQLKDMSGRSVEVTMWGDFCNAEQRLQSLCDSGVFPVLAVKAGRISEFNKTVS  
TIGSSQLFIDPDFVEAEKLNWFEREGKSVPCISLSREFSGSGKVDVTRKTIISQIKDEKLGTSKPDWITVSATIIYLKFDNFCYTACPI  
MNGDRPCSCKVTDNGDGTWRCEKCDKSVDECDYRYILQLQIQDHTDLTCVTAFAQEAGEEIMGISAKDLIYVKNHEHKDEEFEDI IRKVA  
FTKYNFKLKVKEETFSDEQRVKATVVKVDKLNYSADTRTMLGAMDKLRTRDANSLP INPEGSDYNADVNTGIGSSGTRDPSSVQRDRF  
GLHAHQSGQSGNHYSGGGATTS **CNVCGNSGHVSAKC** PGATKPOEQGQYMGGSYRGTGTSYGGGLPRQHVGSY

**AT5G63920 TOP3A; 1 CX<sub>2</sub>CX<sub>4</sub>HX<sub>4</sub>C and 1 CX<sub>2</sub>CX<sub>3</sub>GHX<sub>4</sub>C**

MSRRGGGPVTVLNVAEKPSVAKSVAGILSRGTFRTREGRSRYNKI FEFDYAINGQPCRMLMTSVIGHLMELEFADRYRKHWHSCDPADLY  
QAPVMKHVPEDKKDIKKTLEEEARKSDWLVLWLD CDREGENIAFEVVDVCRVAKHNLFI RRAHFSALIDRDIHEAVQNLDRPNQLFAEA  
VDARQEIDLRIASFTRFQTMLLRDRFAIDSTGEERSRVISYGPCQFP TLTGFI VERYWEIQAHEPEEFWTINCSHQSEGLATFNWMRG  
HLFDYASAVILYEMCVVEPTATVMNVPHPRERFKYPPYPLNTELEKSRASYFRLSSEHTMKVAEELYQAGFISYPRTEETDSFSSRTDL  
RAMVEEQTRHPAWSYAQRLLLEPEGGLWRNPANGGHDDKAHPPIHPTKFSGSENWSRDHLNVYELVVRHYLACVSPAVAAEETVVEID  
IAGERFSASGRAILAKNYLEVYRFESWGGSVIPVYEKQQOIFITTLTDAAVTRPPLLEADLLSCMDKAGIGTDATMHDHIKLLDR  
GYATKDANTRFSPTNLGEALVMGYDDMGYELWKNLRLALMEHDMNEVSVGRKTKAEVLETCLQOMKACFLDARVKKSKLLEAMTIFFER  
SNNTDESESQTAGVVRRCNLCNESDMALRKNRDNFMVGCMMYPOCRNAVWLPGP TLEASVTNVCQSCGPGPVYKILFKFRQIGIPF  
GFDVNHLCVGGCDDILKQLIDICGTGSRSQARPTPGTAPSNNIQGSNTRQSNV **CHCQORGHASFTNC** PSRVPASRNSRPTATNPRNDE  
STVSCNTCGSQVLRANTANRGRQFFSCTPQGC SFFAWEDSINNSSGNATTGNSNGSGSRRGRGRGRGGQSSGRRGSGTSTFV  
SATGEPVSGIR **CFSCGDPSHFANAC** PNRNNSNGNYF

**AT5G47390 KUA1; 1 CX<sub>2</sub>CX<sub>3</sub>GHX<sub>4</sub>C**

MTRR **CSHCNHNCHNSRTC** PNRGVKLVFVRLTEGSIKRSASMGNL SHYTGSGSGGHGTGSNTPGSPGDVDPDHVAGDGYASEDFVAGSSSS  
RERKKGTPTWTEEEHRMFLGLQLKLGKGDWRGISRNYVTRTP TQVASHAQKYFIRQSNVSRKRSSLFDMVPDEVDI PMDLQEPED  
NIPVETEMQGDASIHQTLAPSSLHAPSILEIECE SMDSTNSTTGEPTATAAAA SSSSRLEETTLQSQQLQPQLPGSFPILYPTFYF  
PYYPFPPIWPAGYVPEPPKKEETHEILRPTAVHSKAPINVELLGM SKLSLAESNKHGESDQSLSLKLGSSSSRQSAFHPNPSDSS  
DIKSVIHAL

**AT5G61620 MYB-related-type transcription factor; 1 CX<sub>2</sub>CX<sub>3</sub>GHX<sub>4</sub>C**

MVKETVTVAKT **CSHCNHNCHNSRTC** LNVGNKASVKLVFVNISSDPIRPEVTLARSLSLGNLDALLANDESNGSGDPIAAVDDTGYHS  
DGQIHSKKGKTAHEKKGKGPWTEEEHRNFLI GLNKLKGDWRGI AKSFVSTRTP TQVASHAQKYFIRLNVNDKRRASLFDI SLEDQK  
EKERN SQDASTKTTPKQPI TGIQQPVVQGHQT EISNRFQNL SMEYMPIYQPI PPIYFPPIMYHPNYPMYANPQVVPVRFVHPSGIPV  
PRHIPIGLPLSQPSEASNMTNKDGLDLHIGLPPQATGASDLTGHGVIHVK

**AT1G70000 putative MYB-related-type transcription factor; 1 CX<sub>2</sub>CX<sub>3</sub>GHX<sub>4</sub>C**

MSRS **CSQCGNCHNSRTC** PTDITTTGDNDKGGGEKAIMLFGVRVTEASSSCFRKSVSMNNLSQFDQTPDPNP TDDGGYASDDVHASG  
RNRERKRGTPTWTEEEHRLFLTGLHKVKGKDW RGISRNFKVTRTP TQVASHAQKYFLRRTNQNRRRRSSLF DITPDSFIGSSKEENQLQ  
TFLELIRPVPIPIPIPPSRKMADLNLNKKKTPATTEMFPLSLNLQRPSSSTSSSSNEQKARGSRASSGFEAMSSNGDSIMGVA

**AT5G56840 putative MYB-related-type transcription factor; 1 CX<sub>2</sub>CX<sub>3</sub>GHX<sub>4</sub>C**

MGRR **CSHCNHNCHNSRTC** SSYQTRVVTSSSPPPPPPSILAAAIKKSFSMDCLPACSSSSSFAGYLS DGLAHKT PDRKKGPWTAEEH  
RTFLIGLEKLGKGDWRGISRNFVTKSPTQVASHAQKYFLRQT TLLHKKRRRSLFDMV SAGNVEENSTTKRICNDHIGSSSKVVKQG  
LLNPRLGYPDPKVSVSGSGNSGGLDLELKLASIQSPESNIRPISVT

**AT2G28910 CXIP4; 1 CX<sub>2</sub>CX<sub>3</sub>GHX<sub>4</sub>C**

MPATAGRVRMPANNRVHSSAALQTHGIWQSAIGYDYPYAPTSKEEPTTQOKTEDPENSYASFQGLLALARITGSNNDEARGS **CKKCGRV**  
**CHLTFQC** RNFLSTKEDKEKDPGAIEAAVLSGLEKIRRGVKGVEVEVSSEEEEESESSDSDVSEMERI IAERFGKKKGGSSVKKTSV  
RKKKKRVSDSDSDSGDRKRRRRSMKKRSSHKRRSLSESEDEEGRSKRRKERRGRKREDDSDSEDEDDRRVKKRSRKEKRRRRS  
RRNHSDSDSESEDDRRQRKRKNVAASSDSEANVSGDDVSRVGRGSSKRSEKSRKRHRKERE

**AT5G58760 DDB2; 1 CX<sub>2</sub>CX<sub>3</sub>GHX<sub>4</sub>C**

MSSTRSRKRDP EIVIARDTSELSSSEEEEEEDNYPFSEEEDEAVKNGGKIELEKNKAKGKAPITVKLIKKVCKVKQPGHEAGF  
KGATYIDCPMKP **CFCLKMPGHTTMS** CPHRVVTDHGILPTSHRNTKNPIDFVFKRQLQPRIPIPKKYVIPDQVHCAVIRYHSRRVTCLE  
FHPTKNNILSGDKKGQIGVDFGKVEYKNVYGNIHVSQVNNMRFSP TNDMVISASSDGTIGYTDLETGTSSTLLNLPD GWQGANW  
KMLYGMIDINSEKGVVLAADNFGLHMDHRTNNS TGEPI LIHKQSGSKVCLDCNVPQPELLLS CGNDHFARIWDMRKLQPKASLHDLAH  
KRVVNSAYFSPSSGTKILTTCQDNRI RIWDSIFGNLDLPSREIVHSNDFNRHLTPFKA EWDPKD TSESLIVIGRYISENYNGTALHPID  
FIDASNGQLVAEVM DNITTTITPVNKLHPRDDVLASGSSRSLFIWRPQDNTEMVEEKDKKIIICYGDSKKKGGKQKRGSDDEDEDDI  
FSSKGKNIKVNKYQAKTTKTKT

**AT5G38600 proline-rich spliceosome-associated (PSP) family protein; 1 CX<sub>2</sub>CX<sub>4</sub>HX<sub>4</sub>C**

METEDVLDI PASSNFGSEVKNSLESNGSPEANSLVGNDENVKGNLDDLTEENLRIVGGQESGEILTEQVSDVFNASVESVAVDEKL  
GIQKETLVHSTTL DVSSKAGVRRPTS YDEQQPTVHVTYKHLTRASKQKLESL LQKWEWAENTSLAQDQEQLFESGEETCFPAIRVG  
LQKTSSVSFWIDNQTGHKPLEDFVLVESSTTPLYDRKFAIGLNSADGSRNVEGGLEIIDDDPPR **CFNCGGYSHSLRE** C PRPFDRSAVNS  
ARKLQKSKRNQNSSGPRLPSRYQKTQTGKYDGLKPGTLD AETRQLLNLGELDPPWLNRMREIGYPPGYLAPEDDHLSGITIFGEEVE

TREEIESEEDGEILEKANHPPEPQMKTVEFPGINAPFENADEWLWEAAPSHRNSRSRGRWQQKTSRGHDYRDDGPLGVEPSSYPPRY  
GSRDYDYGYSNEYGSRSRSPGIDRSLRSRKRDRYSSYDADFRERDRDRDRNRDRDRDRDWRDRDRDRDRDRDRDRDRDWSYRLSSRR

**AT5G43630 TZP; 1 CX<sub>2</sub>CX<sub>3</sub>GHX<sub>4</sub>C and 1 CX<sub>2</sub>CX<sub>4</sub>HX<sub>4</sub>C**

MGDGDEQSKELGGVSSSSRRCSSTAGANAARMAKFAAVDAITELVWSPNSGLSLRCADISFTGKAKLLSPNFFDIGLTNMAIHSNST  
SIEDQEDHVDVLRNRDQVQAMIGGSVEDMKPEMVEDKVEITNDDIKNEEAGCSKRSSDSPKAMEGETRDLVNEQLRMESAGSQEEGD  
KAHNRVDRLESMDENNLATLAVVACEGKGDYLPAGEAGPSGSYRREKAKGKEKALSNDENFGGDGEDEDEESFGSVECSNAGLLSRGK  
KRPGFEEQLIFGSKRLKTLNQECLGSTSKLKQDSSFMNWI SNMTKGIWKNEEDNSPFVALTTT SNANGHGQVNAIVDQOQLSPCCVKE  
NSGCRNTGFQSFQSIYCPKQSQDVVDMDFPNDVNAAPLQELPWIPEHCDISKGDDLSSSGNEIGPVAEPNISSGKVVFNQTSKTQSS  
ENKREDKEPNI SLM SLSKSKPNEPKTCGEADGKVPCLTNRNSGLKSLWISRFSSKGSFPQKASETAKEANASASDAAKTRDSRML  
ADKNVIRPSSISVDGPDKPDVTLPIVSSMRIESSEAMASLFARREAMKSIMPSSGLAENAEERDLCI **CFYCGKKGHCLRD**CLEVTD  
ELRDLVQNI SVRNGREEASSI **CI RCFQLSHWAATC**PNAPLYGSGAEGRAMKNALASTSGMKLPISGFTDVPRAVFDVAVQVLRLSRTDVL  
KWINTKKSVSGLGFFLRLRLGKWEELGGTGYVARIDGTEGQSSRRHSEKSLISVKVKGVTCIVESQFISNQDFLEELKAWQSA  
GKSARTSGYDIPSAEELSRKIQRKMLGF

**AT5G51300 SF1; 2 CX<sub>2</sub>CX<sub>3</sub>GHX<sub>4</sub>C**

MESVEMNNPNSQTLDQPPPSNGDTPALALDHMPQNSESVANGSSTPIPD TNGSSAKPELLRPLLSSENGVSKTSLGNDKDQSGGEEE  
TTSRRKRRSRWDPPPSSEINNPSAEGGTDSTGTRKRKSRWADDEPRTQIQLPDFMKDFTGGIEFDEPIQALNSRLLIEISRMQLQSGMPL  
DDRPEGQRSPPPEPVYDNMGIRINTREYRARELRNRERQEI IIAQI I KKNPAFKPPADYRPPKLHKKLFIPMKEFPGYNFILIGIPRGN  
TQKRMERETGAKIVIRGKGSVKEGRHQKDLKYDPSENEDLHVLVEAETOEALEAAAGMVEKLLQPVDEVLNEHKRQLRELATLNGT  
IRDEEF **CRICGEPGHRQYAC**PSRNTFKSDVL **CKICGDDGHPITIDC**PVKGTGKMKMDEYQNF LAELGGTVPESSLKQSATLALGPSS  
GSNPPWANNAGNASAHPLGSTPTKPPSKEYDETNYIGFLPMLLEDGLINLFSFGEIVMAKVIKDRVTGLSKGYGFVKYADVQMA  
NTAVQAMNGYREFGRTLAVRIAGKSPPIAPPGPAPQPPTQYPPSNQPPGAYPSQQYATGGYSTAPVWPVPPVPSYSPYALPPP  
SYHPVHGQHMPPYGMQYPPPPPHVTQAPPPGTTONPSSSEPOQSFPPGVQADSGAATSSIPPVYGVSSVTAMPQPPYMSYPSYNAVP  
PPTPPAPASSTDHSQNMGNMPWANNPSVSTPDHSQGLVNAPWAPNPPMPPTVGYQSMSGNVPWAPKPPVQPPAENPSSVGESEYEKEMA  
EMK

**AT1G23860 RSZ21; 1 CX<sub>2</sub>CX<sub>3</sub>GHX<sub>4</sub>C**

MTRVYVGNLDRVTERELEDEFEKAFGVLRNVVARRPPGYAFLEFDDERDALDAISALDRKNGWRVELSHKDKGRRGGGGRRGGIEDS  
**KCYECGELGHFARE**CRRGGSVRRRSPPRRRSRSPDYGYARRISPRGRSPRRRSVTPPRGRSRSRSPPYGSRRRDSPRRDS  
RRSPYANGV

**AT4G31580 RSZ22; 1 CX<sub>2</sub>CX<sub>3</sub>GHX<sub>4</sub>C**

MSRVYVGNLDRVTERELEDEFRAFVVRVWVARRPPGYAFLEFDPDARDARALDGNKNGWRVEQSHNRGERGGGGRRGGGG  
GRGGGGSDLK **CYECGETGHFARE**CRNRGGTGRRRSKSRSTPPRYRSPSYGRSRSYSPRARSPPPRRRSPPPPARGRSYRSPPY  
RAREEVYANGNGLKERRRS

**AT2G24590 RSZ22A; 1 CX<sub>2</sub>CX<sub>3</sub>GHX<sub>4</sub>C**

MSRVYVGNLDRVTERELEDEFRSFGVIRS VVARRPPGYAFLEFDSRDARDAREVDGKNGWRVEQSHNRGGGGRRGGGGGG  
GRGGSDLK **CYECGESGHFARE**CRSRGGSGRRRSRSPRYRKSPTYGGRRSYPARSPPPRRRSPPPRGRNYSRSPPPYRARD  
EVPYANGNGLKDVRRRS

**AT3G53500 RSZ32; 2 CX<sub>2</sub>CX<sub>3</sub>GHX<sub>4</sub>C**

MPLYDDRYGNTRLYVGRSSRTRTRDLERLFSRYGRVRDVMKRDYAFVEFSDPRDADDARYYLDGRDFDGSRI TVEASRGAPRGRDN  
GSRGPPPGSGR **CFNCGVDGHWARD**CTAGDWKNC **CYRCGERGHIERNC**KNSPSPKARQGGYSRS PVKSRSPPRRRSPSRSLRSRGRS  
YSRSPVRREKSVEDRSRSPKAMERSVSPKGRDQSLSPDKVIDASPKRGSYDYGSPKENGNGRNSASPIVGGGESPVLNGQDRSPI  
DDEAELSRSPKGSSE

**AT2G37340 RSZ33; 2 CX<sub>2</sub>CX<sub>3</sub>GHX<sub>4</sub>C**

MPLYDDRYGNTRLYVGRSSRTRTRDLERLFSRYGRVRDVMKRDYAFVEFGDPDADDARHYLDGRDFDGSRI TVEFSRGAPRGRDF  
DSRGPPPGAGR **CFNCGVDGHWARD**CTAGDWKNC **CYRCGERGHIERNC**KNSPKLRRSGYSRS PVRSRSPRRRSPSRSLRSRGRS  
RSPVRRRSRVEERSRSPKRMDDLSPRARDRSPVLDDGSPKI IDGSPPPSPKLQKEVGSDDRGGSPQDNGRNSVVS PVVAGGDSK  
EDRSPVDDDYEPNRTSPRGSSE

**AT1G60650 RZ-1B/RBGB1; 1 CX<sub>2</sub>CX<sub>3</sub>GHX<sub>4</sub>C**

MKDRENDGNLESRI FVGGLSWDVTERQLESTFDRYGKITECQIMVGRDTRPRGFGITFTDRRGADDAIKHMHGRELGNKVISVNKAE  
PKVGGEDVDQLKGGGYSRKGTEDE **CFKCRPGHWARD**CPSTGDDRERFRVPLAMRSRIGDIDGHRDRYGRDLEREREREREFDRY  
MDGRDRDGGRYSYRDRFSDGKYEPRDHYPFERYAPPGRFVSDRYGMPEHHLENEYGRERSYDRDRYARTSDRYGDMGPIRDEGR  
PYRSRPGPYDRSPRGGPSSYERW

**AT5G04280 RZ-1C/RBGB3; 1 CX<sub>2</sub>CX<sub>3</sub>GHX<sub>4</sub>C**

MAAKEGSRI FVGGLSPEVTDRLERAFSRFGDILDCQIMLERDTGRSRGFGITFADRRAMDESIREMHGRDFGDRVISVNRAE PKLGR  
DDGESHGSRGGRDSGYSIAGKSGFGGGGGGGRVGEDE **CFKCRPGHWARD**CP SAGGGGGPVGGFSSRASAYGSDGRVDRYDRY  
VDRERYIDDRYDGAARYGARDRFSREAYIPDRYASDRYAAPDRFAGGDRYSRGSDRYPPGSYDKARSFERDIAPSAGSDRYGGGRA  
GGPIRGGGEEGRGFRSRAGAPYERPSRSGGGGAYPSSSTFDY

**AT3G10400 U11/U12-31K; 1 CX<sub>2</sub>CX<sub>3</sub>GHX<sub>4</sub>C**

MKKRKIIHSDDEEDDTFYRYRYSVAAPPPSNPKHQSSSAKSSAPGGGGGLAPSKSTLYVSNLDFSLTNSDIHTLFSTFGKVARVTVL  
KDRHTRQSRGVAFLVYSREDAAKAARSMDAKIILNGRKLTVSIAADNNGRASEFIKKRVYKDKSR**CYECEGDEGHLSYEC**PKNQLGPRERF  
PPPKRGRREEEGEAEIISWSAAAPSLAVAEFEFEENWASVVDNEAGERLRKREAEERMRKRKEKVSYSFDESDEDED

**AT3G55340 PHIP1; 2 CX<sub>2</sub>CX<sub>3</sub>GHX<sub>4</sub>C**

MVLSNKKLQRIQDLAELSLSVSVSETNPQSQSLKLLLDSSSHKPRLSKREKRRNCETFAREDEIRENEVNGGSSSEKTDTKIKKKRK  
RDDAVEVDELEGDEGTKEEQPKQKKNKKKKKKRKNKTPKKAEEGNVEEKVVEEIEVNTDNKEEDGVVFNKLYVGGIPYQSTEDDIR  
SYFRSCGVIKVDCKMRPEDGAFSGIAFITFDTEGAKRALAFDRAAMGDRLYTIQQYVKTTPSIPRRTSSGFAPEMVDGYNRVYIG  
NLAWDTTERDIRKLFSDCVINSVRLGKNKETGEFKGYAHVDFDVSVAIALKLDQQVICGRPVKICCALKDRPATDHTPGETNAGSY  
NMEDTYAADPVPALAGRSEVDDGNYFATTVSSSKVRRV**CYECEGKGHLSIAC**PIKLQKADDQANSKLGQETVDGRPAMQSYGLPKNS  
GDSYMNETYASTNETYNGGYSASAVGTGKVKRRN**CYECEGKGHLSIAC**PIKLQNTSHTNSTLDHQTVVEAGPTQVTSYSLQKTRD  
TENNGGSFMDESYATVPI SIDVTNGANDASLTSAVSTGKIKKRCYECGKGHLSACPNKLOKQG

**AT1G53720 CYP59; 1 CX<sub>2</sub>CX<sub>4</sub>HX<sub>4</sub>C**

MSVLIVTSLGDIVIDLHSDKPLTCKNFLKCLKIKYINGCLFHTVQKDFTAQTGDPGTGAGGDSIYKFLYGEQARFYKDEIHLDLKHS  
KTGTVAMASGGENLNASQFYFTLRDDLDYLDGKHTVFGQIAEGFDLTRINEAYVDPKNRPYKNIRIKHTHILDDPFDDPPQLAEMMPD  
ASPEGKPKKEEVKDDVRLDEDDVWPMDEELGAQEELEEVIREKAAHSSAVVLESIGDIPAEVKKPPDNVLFVCKLNVPTEDEDLHTIFSRFG  
TVVSADVIRDFKTGDSLCAFYIEFENKESCEQAYFKMDNALIDRRIHVDFSQSVSKLWSQFRQKDSQKGGKNG**CFKCGSTDHIAKDC**V  
GGPSSKFIKQDQNRQHGGGEGYEMVFEEDVHETPKHNSHERERSEKIQRSPHNGEGEKQRHRDERDDGRRQHREDARELERKHREK  
ERESREDEDRRRRRRRRESRDKESRREDEDHRSHRDYKERRERDRHRGREAHRERDR

**AT5G49930 EMB1441; 1 CX<sub>2</sub>CX<sub>3</sub>GHX<sub>4</sub>C**

MVKVRMNTADVAAEVKCLKRLIGMRCNSVYDISPKTYMFKLLNSSGITESGESEKVLILLMESGVRLHTTAYVRDKSNTPSGFTLKRKH  
IRTRRLEDVRLQGYDRIIVFQFGLGANAHYVILELYAQNIILTDSEYMIMTLRSHRDDNKGFAIMSRHRYPIEICRVFERTTVSKLQ  
ESLTAFLVKDHDQAQIEPKEQNGGKGGKSNSTGAKQYTLKNI LGDALGYGPQLSEHII LDAGLVPTTKLSEDKKLDNEIQLLVQAV  
IVFDWLEDIINGQKVPYQIILMQKQILANDTSESSEGGVKKMYDEFCSILLNQFKSRVYEFETFDAALDEFYSKIESORSEQQKAKE  
DSASLKNLIRQDQENRVQILKKEVNHCVNMAELIEYNLEDVDAAILAVRVALAKMGWDDDLARMVKEEKLGNPVAGVIDRILEKNC  
MTLLLCNNLDEMDDEKTPVEKVEVDLSLSAHGNARRWYEMKKQETKQEKTVSAHEKAFAAEKTRHQLSQEKVVAITISHMRKVHW  
FEKFNWFISSENYLVISGRDAQONEMIVKRYMSKGDLYVHAEHLAGASSTVIKNHKPEQNPPLTLNQAGCFTVCHSQAWDSKIVTSAWV  
VYPHQVTKTAPTGEYLTGVSFMIRGKKNFLPPHPLIMFGLLFRLDESSLGAHLNERRVRGEEGMNDVVMETHAPDEHSDTESENEAV  
NEVVSASGEVDLQESSTALSQDTSSLDMSSSGITEENVASATSOLELDRTLGLGAATVAGKDTIETSKDDMEEKMKQEEKNAVVRD  
KPYMSKAERRKLMGQSGNTAADGNTGQEQQRKEKDVSSLSQATKSI PDNKPAGEKVSRRGQGRGLKMKKEYADQEDERKIRMALLA  
SSGKPKQTDVESQNAKTAVTEVKKPSEETDDAVKI**CYRCKKVGHLARD**CHGKETSDMDKVVMEEDIHEVGDEEKEKLIDVDYLTGNPL  
PTDILLYAVPVCOPYNALQSYKRVKAI PGSMKKGKAAKTAMNLFTHMSEASVREKELMKACTDPELMAALVGNVKI TAAGLTQLKQKQ  
KKGKSGKQOHS

**AT5G47430 PQT3L; 1 CX<sub>2</sub>CX<sub>3</sub>GHX<sub>4</sub>C**

MAIYYKFKSARDYDTIAMDGPPI SVGILKDKI FETKHLGTGKDLDIVSNAQTNEEYLDEAMLI PKNTSVLIRRVPGRPRITVIITQEP  
RIQNKVEDVQAEITNFPVADPSAAEFPEDEYDEFGTDLYSIDTQDAQHIIPRPHLATADDKVDEESKI QALIDTPALDWQQRQGDTF  
GAGRGYGRGMPGRMNGRFGMERKTPPPGYV**CHRCNIPGHFIQHC**PTNGDPNYDVKRVKPTGI PKSMLMATPDGSYSLPSGAVAVLKP  
NEDAFEKEMEGLPSTTRSVGELPPELKCPLCKEVMDAALTSKCCYKSFCDKCI RDHII SKSMCVGRSDVLDLPPNKTLRDTINRI  
LEAGNDSTENVGSVGHIPDLESARCPPPKALSPTTSVASKGEKPVLSNNNDASTLKAPMEVAEITSAPRASAEVNEKPVDADESTQG  
SVIVKEATVSKLNTQAPKEEMQQQVAAGEPGKPKKPRVPGNDMOWNVVPDLAGPDYMMQMGPGPYFNGMQPGFNGVQPGFNGVQPG  
FNGFHPGFGNGFGFPFGAMPFFMGYGLNPMDMGFGGMMNMHPDFMAQGFGNIPPPHRLAEMGNRMNLQRAMGRDEAEARNAEM  
LRKRENERRPEGGKMRDGENSRMMNNGTSASASSINPNKSRQAPPPPIHDYDRRRRPEKRLSPEHPPTKNI SPSRDSKRKSERYPD  
ERDRQRDRERSRHQDVREHRTDRRRDEDRSRDRHRHRGETERSQHHRKRSEPPSSEPPVPATKAEIENNLKSVFARISFPEETS  
SGKRRKVPSSSSTSVTDPSASASAAAAGVTSVHRHSSRKEIEVADYESSDEDRHFKRKPSRYARSPVVVSDVSEDKLRYSKRGKERS  
RA

**AT4G17410 PQT3; 1 CX<sub>2</sub>CX<sub>4</sub>HX<sub>4</sub>C**

MAIYYKFKSARDYDTISMDGPPI TVGLLKEKI YETKHLGSGKDLDIVISNAQTNEEYLDEAMLI PKNTSVLIRRVPGRPRIRIITREEP  
RVEDKVENVQADMNNVITADASFVEDEFDFGNDLYSIDPAPAVHSNNLCHDSAPADDEETKLKALIDTPALDWHQGGADSFPGRGY  
RGMAGRMGGRGFMERTTPPPGYV**CHRCNVSGHFIOHC**STNGNPNFDVVRKVPPTGI PKSMLMATPNGSYSLPSGAVAVLKPNE  
EMEGLTSTTRSVGEFPPELKCPLCKEVMRDAALASKCCLKSYCDKCI RDHII IAKSMCVGATHVLADDLPPNKTLRDTINRILESGNSS  
AENAGSMCQVQDMEVRCPPPKALSPTTSAASGGEKPPAPSNNNETSTLKPSIEIAEITSAWASAEIVKVEKPVDA SANIQSSNGKEA  
AVSOLNTQPPKEEMPQQVASGEQGRKPKKPRMSGTDLAGPDYMPMGPGPNQYFNGFQPGFNGVQHGFGVQPGFNGFHGFGNGFPG  
FPFGAMPFFVGYGFGVIHPDFAAQGFGNIPPPYRDLAEMGNRMNLQHPIMGREEFEAKTEMKRKRENEIRRSEGGNVVRDSEKS  
RIMNNSAVTSSPVKPKSRQPPPISSDYDRRRRSDRSSPERQSSRRFTSPRRSSSRKSERDRHDLSEHRRDRPRETDRKHRRRS  
EKSSSDPTVEIDDNNKSNVFTRI SFPEESSGKQRKTSKSSPAPPESSVAPVSSGRRHRSRREEMVEYDSSDDEDHRHFKRKPSRYKRS  
SVAPSDAGDEHFRHSKRSKGERARA

**AT3G45950 Pre-mRNA splicing Prp18-interacting factor; 1 CX<sub>2</sub>CX<sub>4</sub>HX<sub>4</sub>C**

MATASVAFKSRKDRKQKELEEARAGLAPAEVDEGGKEINLHI PKYLTIPPLYAKSEKPSLKHQKNWTKPVSTTSYDRGAKTYQAE  
KYRKA**QONCGAMTHDKTC**MERPRKVGAKYTDKNIAPEKIESELEFDYDGKDRWNGYD PSSYCHVRDRHEAKENAREKYLNEQQLIA  
KLEEKNI DGEEDLRVDEAKIDE SMQVDFAKVKRVRTTDGSGKGTVRNLRIREDPAYLLNLDVNSAYYDPKSRSMREDPLPYTD PNE

KFCLRDNQYRNSGQAIEFKQQNMYSCEAFDKGQDIHQQAAPSQAELCYKRVKIAKEKLNRSQRKDAI IAKYGDAAAKDDI PMELLLGQSK  
LIKTSQANGIKLVPNVFVNLCLFVVFVVIS

**AT1G65660 SMP1/SLU7A; 1 CX<sub>2</sub>CX<sub>4</sub>HX<sub>4</sub>C**

MATASVAFKSRREDHRKQIELEEARAGLAPAEVDEDEGKEINPHI PQYMSSAPWYLNSEKPSLKHQRKWKSDPNYTKSWYDRGAKI FQAE  
KYRKGACQONCGAMTHHTAKACMDRPRKIGAKYTNMNIAPDEKIESFELDYDGKRDRWNGYDPSTYHRVIDLYEAKEDARKKYLKEQQLKK  
LEEKNNNEKGDDANSDGEEDDLRVDEAKVDESQMDFAKVEKRVRTTGGGSTGTVRNLRREDTAKYLLNLDVNSAHYDPKTRSMRE  
DPLPDADPNDFYLGDNQYRNSGQALEFKQLNIHSWEAFDKGQDMHQQAAPSQAELLYKSFQVAKEKLSQTKDTIMDKYGNAATEDEI  
PMELLLGQSERQVEYDRAGRIKGOEVILPKSKYEEDVHANNHTSVWGSYWKDHWGKYKCCQOIIRNSYCTGSAGIEAAEAALDLMKAN  
IARKEATEESPKKVEEKRMASWGTDIPEDLELNEEALANALKKEDLSRREEKDERKRYNVKYNNDVTPPEEMEA YRMKRVHEDPMKDF  
L

**AT4G37120 SMP2/SLU7B; 1 CX<sub>2</sub>CX<sub>4</sub>HX<sub>4</sub>C**

MATASVAFKSRREDHRKLELEEARAGLAPAEVDEDEGKEINPHI PEYMSKAPWYLNSEKPSLKHQKNWIEPEPKIWDYDRGKKIYQAE  
KYRKGACINCGAMTHSSKACMDRPRKIGAKYTNMNIADDEKIESFELDYDGKRDRWNGYDTSTYRHVVDRYDAKEEARKKYLKEQQLKK  
LEEKNNNEGGDSDGEEDLDLRVDEAKVDESQMDFAKVEKRVRTTGGGSTGTVRNLRREDTAKYLLNLDVNSAHYDPKTRSMRE  
DPLPDADPNDFYLGDNQYRNSGQALEFKQINHSWEAFDKGQDMHQQAAPSQAELLYKSFQVAKEKLSQTKDTIMEKYGNAATEGEI  
PMELLLGQSERQIEYDRAGRIMKGOEVIIPKSKYEEDVHANNHTSVWGSWVKDHWGKYKCCQOTIRNSYCTGSAGIEAAEASIDLKMAN  
IARKEASKESPKKVEEKMATWGTDIPEDLELNEEALANALKKEDLSRREEKDERKRYNVVNTDVTSEEMEA YRMKRVHEDPMRNF  
PG

**AT5G42540 XRN2; 1 CX<sub>2</sub>CX<sub>3</sub>GHX<sub>4</sub>C**

MGVPSFYRWLIQRYPLTIQEVIEEEPELVNGGGVTIPIDSSKPNNGEYDNL YLDMNGIIHPCFHPEDKPSPTTFTEVFQCMFDYIDR  
LFVVRPRKLLFMAIDGVAPRAKMNQORARRFRAAKDAAEAAAEEQLREEFEREGKLLPKKVDSSQVFDNSVITPGTEFMATLSFALRY  
YIHVRLNSDPGWKNIKVILSDANVPGEHEKIMS YIRCNNHPGYNPNTHHCLYGLDADLIMLSLATHEIHFSILREVVFPPGEEGKCF  
LCGQEGHRAADC EGKIKRKTGEMLDNTEADVVKPYEFVNIWILREYLEHDMQIPGAKKNLDRIDDFIFICFFVGNDFLPHMPTLEI  
REGAIELLSVYKFKRSKYLTDSSKLNLRNVERFIKAVGMYENQIFQKRAQVQQRQSERFRDKARDKARDNARDNAQASRQFSGK  
LVQLDSLDEVSLSHSSPSRKYLRSLDDNIGVANVETENSLKAEELDNEEDLKFLLKLLRDKDGFERSNGEQDKVKLNKVGWRERY  
YEEKFAAKSVEEMEQIRRDVVLKYTEGLCWIMHYHYHGVCSWNWFYPHYAPFASDLKGLEKLDIKFELGSPFKPFNQLLAVLPSASAH  
ALPECYRSLMTPDPIADFPADFEIDMNGKRYSWQGISKLPFVEEKRLLEAAAQVEKSLTNEEIRRNSALFDMFLVVAASHPLGELIR  
SLNSRTNNLSNEERATII EKIDPGLSDGMNGYIASCGGDSQSPSCFCSTVEGMEDVLTNQVICAIYKLPEDIRGSEITHQIPRLAIPKKT  
ISLVDLKGGLLWHEDGDKRRAPPKVIKIKRYNPEGSISGRLGKASHRLVLTINAQPDYMNINSEPALCPNTVFQNERVPKIPTFK  
DNGIQWISPPPSQITPKKMNSPQRQKAWKDETPQSREKSKLKSLSLVNPLKMKKTKSPQREFTREKKENITPQRKLTAKRQVQVHI  
RMMEEAKMIKQRKKEKYLKKAQYAGAPPKTA

**AT1G75660 XRN3; 1 CX<sub>2</sub>CX<sub>3</sub>GHX<sub>4</sub>C**

MGVPSFYRWLAEKYPLLADVIEEPEVEIEGKIPVDTSKPNPNLE YDNL YLDMNGIIHPCFHPEDRPSPTTFEEVFQCMFDYIDRLF  
VMVRPRKLLYMAIDGVAPRAKMNQORSRRFRSAKADASDAAEEERLREEFEREGRLPKKVDSSQVFDNSVITPGTEFMGVLSIALQYV  
HLRLNHDVGNKIKVILSDANVPGEHEKIMS YIRLQRNLPGFDPNTRHCLYGLDADLIMLSLATHEVHFSILREVYTPGQEKCF  
GQMGHFASNCEGKPKKRAGESDEKGDGDFVKKPYQFLHIWVLRLEYLEMRI PNPPFEIDLERIVDDFIFICFFVGNDFLPHMPTLEI  
REGAINLLMAVYKFRSFDGYLTDGCKPNLKRVEQFIQAVGSFEDKIFQKRAMQHQRQAERVKRDKAGKATKRMDEAPTVQPDVLPV  
ARFSGSRLASAPTPSPFQSNDRSAPHQKVRRLSPGSSVGAATVDVENSLES DERENKEELKTKLKEIREKSDAFNSDTTEEDKVLG  
QPGWRERYEYEFVSVTPEEMERVRKDVVLKYTEGLCWVMHYMEGVCSWQWFYPHYAPFASDLKLDGEMDIKFELGTPFKPFNQLLG  
VFPAASSHALPERYRRLTMDPNSPIIDFYPTDFEVDMNGKRF SWQGI AKLPFIDERRLLEAVSEVEFTLTDEEKRRNSRMCDMLFIATS  
HRLAELVFLDNHCRQLSAREVDFVKVIKPKLSDGMNGYLT PCSGETHPVFRSPMEGMEDILTQVICCIYRLPDAHEHITRPPPGV  
IFPKKTVDIGDLKPPPALWHEDNGRRPMHNNHGMHNNHGMHNNQGRQNP PGSVSGRHLGNAHRLVSNLSQMGTDRYQTPTDVPAPGYG  
YNPPQYVPIPIYQHGGYMAPPGAQGYAQPAPYQNRGGYQPRGSPGRFPSEPYQSQSREGQHASRGGGYSGNHQNQHQQQQWHGQGGSEQ  
NNPRGYNGQHHHQGGDHRGRGRGSHHHHDQGGNPRHRY

**AT1G54490 XRN4; 1 CX<sub>2</sub>CX<sub>4</sub>HX<sub>4</sub>C**

MGVPAFYRWLADRYPKSISDVVEEPTDGGRGDLIPVDITRPNNGFEFDNL YLDMNGIIHPCFHPGKPPATYDDVFKSMFEYIDHL  
FTLVRPRKILYLAIDGVAPRAKMNQORSRRFRAAKDAAEAEAEERLRKDFEMEQILSAKEAETCDNSVITPGTFMAILSVALQYY  
IQSRLNHNPGWRYVKVILSDSNVPGEHEKIMS YIRLQRNLPGFDPNTRHCLYGLDADLIMLSLATHEVHFSILREVITYPGQEKCFV  
CGQTGHFASDC PGKSGSNAAADIPHKKQYFLNIWVLRLEYLQYELAI PDPPFMINFERIIDDFVFLCFFVGNDFLPHMPTLEIREGA  
INLLMHVYRKEFTAMGGYLTDSGEVLLDRVEHF IQAVAVNEDKIFQKRTRIKQSMNNEEMKQRSRRDPSEVPPEIDDKIKLGEPEGYK  
ERYYA EKFS TTNPEETE QIKQDMVLKYVEGLCWCRYYYQGVCSWQWFYPHYAPFASDLKLPDLEITFFIGEPFKPFQDLMGTLPAA  
SSNALPGEYRKLMTDPSSPIKFPADFELDMNGKRF AWQGI AKLPFIEEKLLAATR KLEETLTVEEQQRNSVMLDLYVHPAHLPGQ  
RILQYYHYFYQHMPPECLPMMIDPNSSQGMNGFLWFSERNGFQTRVDSVNGPLPCIEQNRALNVTYLCPAKHSI SEPPRGAIIPDKIL  
TSVDIKFPPLWHEDNSNRRRQARDRPQVVGAIAGPSLGEAAHRLIKNTLNMSSTGAASGLIDPNGYRNVPNGYSYGGVNRPRAPGP  
SPYRKAYDDSSYYYGKYNNSTQGTFFNNGPRYPYPSNGSQDYNRNYSKIVAEQHNRGGLGAGMSGLSIEDNGRSKQLYSSYTEANAN  
LNPLPSPPTQWIGTQPGGNFVGGYRDGVGYSETNGKSVKVIYQAKTQPSHRGANL

**AT1G54930 protein of unknown function; 1 CX<sub>2</sub>CX<sub>4</sub>HX<sub>4</sub>C**

MSSGD CFHCHQPGHWAKNC PLKTTTKPTAAAAPSPPDIHPCNAGPCNTVTSKTEKNPNRRFYTCPCSGYFKWCDQGLGDCGFFKWEDEG  
ESLLHETELSDGNVKNRNLGVVVELELNPASSSESNTLGNRIVDTLVNPVTVGKESIPVFAGFNDQGSVNSIVPSFDLITLYDDAV  
RLETKEPVLPSVAPKHLDTQVETLCGNALEAVESSQNTSDLVLNANNKPEHIHQRAATSGETEASYSGSSMMVLIEQYKSEKLYLES

ISMKHVEALTAYTGSYKQLES LRDRASLKKQLLEVEKQVKLCEAETSEFAASVQEVSGEMAKSQKMKVEIAGKVAKEVRVDKQRD

**AT1G67210 proline-rich spliceosome-associated (PSP) family protein; 1 CX<sub>2</sub>CX<sub>4</sub>HX<sub>4</sub>C**

MAASSGSGLEAE EGEI SIDMEEDMDLTEDDFRNVSGQFSGQASIVEVGDVAVRVE TVKVDVSSKSGVKKRARTISLEQQPSVHVITYKHL  
TRDSKQKLESLLQQWSEWAEQNSLSEDDQEQVLEAGDETYFPALRVGLQKTS SVSEWFDYQGTGHSSSKSVPVESSTPLYNRGFTIGL  
DSGSNNVEGGLEI IDDPFR **CFNCGAYSHSIREC** PRPFDRSAVSNARRQHKKRNQTPGSRLPSRYYSQSLQRGKYDGLKPGSLDAETRKL  
LGLKELDPPPWLNRMRI GYPG YFAVEEDDDHSRITIFGEEETKEEEEVKT EEEGEILEKAS PQEPRKIMTVGFPGINAPIPENADSW  
LWEQRNSNTGHTNYHNHLRPQYEMGPLGIQLSSSFPPMHGIRYDHRFGL

**AT1G75560 protein of unknown function; 8 CX<sub>2</sub>CX<sub>3</sub>GHX<sub>4</sub>C**

MSSMSRSRSR SRSDRFRSRSRSPDRRRMRSERVSYHDAPSRREREPRAAFS QGNL **CNNCKRPGHFARDCS** NVSV **CNNCGLPGHIAEC**  
**TAESRCWNCREPGHVASNC** SNEG **CHSCGKSGHRARDCS** NSNDSRAGDLRL **CNNCFKQGHLAADC** TNDKAKCKNCR TSGHIARD **CRNDPVC**  
**NICISISGHVARHC** PKGDSNYS DRGSRVRDGGMQRGLSRMSRDREGVSAMI **CHNCGGRGHRA YEC** PSARVADRGFRRY

**AT2G06904 protein of unknown function; 1 CX<sub>2</sub>CX<sub>3</sub>GHX<sub>4</sub>C**

MPLKRSRGRESVEEEGRSLDLPSSRRYDLRERVRGIAAMPERI IREDVQIRDGMIDSDCEDDFVITGVRTVEQKLASEGHEIVMVHDYV  
SVSSKSSASPSFALSLSYSPISYSDPKEDQDPPISPYVPEAVDHS PDS PFALLWEGTSPILRFEADMRADAIPTFDGGFTSGIKILE **CF**  
**ICGEDGHYPQDC** QFYTYIWPPLL VSTVESMSIMRLPVC

**AT2G12880 putative CCHC-type zinc finger protein; 2 CX<sub>2</sub>CX<sub>3</sub>GHX<sub>4</sub>C**

MAPKFTLNQERDNDRETRASYNDRRRNDYDPR **CYKCGKLGHFARSCH** HVVTQPTTAYIT **CYFCSEEGHRSNGC** PNKRTDQVNPKGHC  
YWCGNQDHRFNLI IWRSRCLFRLMKPKYAF

**AT2G15180 putative CCHC-type zinc finger protein; 1 CX<sub>2</sub>CX<sub>3</sub>GHX<sub>4</sub>C**

METIIYSSSDEEDSYGCSQDSYNETRFVSWHDDGYSSSSDFEEEDPGGAPEPEPPDRYSSHATPPSYSKPWI SWNP I PKTNFYPTFY  
PTRKVIYKLFVHNGSKTYGPEFFLFSGLGYLQWESNMNYYFEFHSTAQEDKLSIALGQLKGSALWVWDQDEYNRWYERRAPI RTWERLK  
WNMCAKNEPQSLSPAHHVQKQKPTFLPQM QAT TQ GKCTFQTKHVELT **CYRCKQEGHIAKIC** PTRETTTKVGLEQQELLKAKEKQEI VS  
SPKGKNEQAE TCQ TDLNNSMNVI THLSSAKSIAKVS GTKENI TDQGEASTMEKVFTEESKNQGGPTLDEITVNKDES VNDTIQIKGEP S  
DAQQFPKTCQCNLLNPNYTLTYL CVGKKVLR TKPLEEGDDV RMGADVPADALVDRLLAGFFDGLSDGLPEVLHVSNQLV R TKESY  
FELPFCASQSHIWKLGDP LRHPEPFTLN P

**AT3G02820 putative SWI3-like component of replication fork protection complex; 1 CX<sub>2</sub>CX<sub>3</sub>GHX<sub>4</sub>C**

MESAPTG **CFKCRPGHWSRDC** PSAPVAGNNSVSSSSAPSQIPNNEFORSSSKGTSIAPAPKVTKTRVQRPKLTPELLLSE DGLGYVL  
RYFPKSFKYRGRGKEVSDLGNLIRLYSEWH THLLPYYSFDHFVHKVQVASTKRVKNCINELRERVASGVDPNKLYEKQEENTVPSDDQ  
DMDQPSHDEENI P SKSVDAD TNADAFEDSMLNEIFDNASKLP SDEQNMDKSELTEEQRARMEANRLKAMEKAQNI SEEQVRMEANRL  
KALERAKARLQPNQD

**AT3G42860 putative CCHC-type zinc finger protein; 4 CX<sub>2</sub>CX<sub>3</sub>GHX<sub>4</sub>C**

MKKITIPVESLDEEDDFLLQLAAIEAEAAAKRPRVSSIPEGPYMAALKGSKSDQWQSSPLNPASKRSVAVTTGGFQORS DGGGGVAGEQ  
DFPEKSCPCGVGICLILTSNTPKNPGRKFYKCPNREENGCGGFFQWCDVQSSGTTTTSNSYGNNDTKFPDHCPCGAGLCRVLTAK  
TGENVGRQFYRCPVFEGSCGFKWCNDNVSSPTSYSVTKNSNFGSDTRGYQNAKTGTP **CYKCGKEGHWARDC** TVQSDTG PVKSTSA  
GD **CFKCGKPGHWSRDC** TAQSGNPKYEPGMKSSSSSGE **CYKCGKQGHWSRDC** TGQSSNQFQSGQAKSTSSTGD **CYKCGKAGHWSRDC**  
SPAQTNTTPGKRQRY

**AT3G43490 putative CCHC-type zinc finger protein; 2 CX<sub>2</sub>CX<sub>4</sub>HX<sub>4</sub>C**

MPPKRKIDNFLFDGEDTVAI IDDEANEDLRLKILEKAFSRRNVNDNKLSDLSDFD PGVVSTVMVNGGKSEEVKNSKSNKKMKRNKLEAA  
NEIVTHCVERQDEDNMVEDVVRGEEEDGETTSNSVMTKLLRGARYFDPLDAGWVT **CYSCGEKDHITVSC** PTLTNCRKS **CFICASLEHGA**  
**ROC** TKVWDIDANLGIHQDKTQRFKGLCGSGDDDEVTDLMLNPQHRGLENMIQGLFLARIRDYTKPKWFDSTNYLELARTMI

**AT3G43590 putative CCHC-type zinc finger protein; 6 CX<sub>2</sub>CX<sub>3</sub>GHX<sub>4</sub>C and 1 CX<sub>2</sub>CX<sub>4</sub>HX<sub>4</sub>C**

MPRONKDEKVFDDGEDDEDREDPVAITEVDNNGEEEDDDEANEDLSLKILEKALSRRDVG NKLSDLSSDSGVSVTMVNGVSKVKKSE  
SSKMKRNKLEADHEIPIVWNDQDEEKVVEI VKGEGEDDEVERSDPKTEETASNVLKLLRGARYFDPPDAGWVS **CYSCGEQGHTS**  
**FNCP** TPTKRRK **CFICGSLEHGAQCS** KGHDCYICKKTGHRAKDC PDKYKNGSKGAV **CLRCGDFGHMILCK** KYEYSKEDLKD VQCYICK  
SEFHLCCVEPGNSLSWAVS **CYRCQQLGHSGLAC** GRHYEESNENDSATPERLFNSREASE **CYRCGEEGHFARECP** NSSSISTSHGRESQT  
L **CYRCNGSGHFARECP** NSSQVSKRDRETSTTSHKSRKNKENSEHDSTPHESNGKTKKKKKKTHKEEQPQTS PRKRKRGGWITEPE  
EESFORGMRRPKSPI TPGYNRSPSTHIGNYRSPKFNSGGHYPGSQSSRHSGSPSRWQPSHQHHHHQHLLHHHQHNSYEPAPPR  
HGRANRYSEFAGNYERW

**AT3G62330 putative CCHC-type zinc finger protein; 1 CX<sub>2</sub>CX<sub>3</sub>GHX<sub>4</sub>C**

MESTRSDPELDDDFSEIYKEYTGPASAVTNNIQDKDKPVKQRSEERCDEEEQLDPNSVPTDFTSREAKVWEAKSKATERNWKKRKE  
EEMI **CKICGESGHFTQGC** PSTLGANRKSQEFFERVPARDNNVRVLFTEKVMESIERETSCKIKLDEKFIIVSGKDRLLLRKGVDAVHKV  
KEDGEMKSSSVSHRSRSPRRTSVGSPSRARNSEFPQRQLPSHGSSSFERSGRQDKFVDNRFREETRVRENQRNVPRGSPQAYGSDRA  
RSRSTHSKSPGRPRYSGWDPYDRQKPEVSGYRSEWRDQERMGGSSDIQVSHQFERPPFPQTLELELELEYTRDALELEKKRDKED EEN  
NKHRETI RELRESYMKLAGLRGMNAKQWDDFLQ LDAQRRQQARQNSGLSYGNRYQFPFYAEFDDGYSSNPPPYGGNNMPMDSKGRY  
PNHGDNYSSRHQDNNGGFFQRQRREY GKAYNRY



**AT4G00980 protein of unknown function; 1 CX<sub>2</sub>CX<sub>3</sub>GHX<sub>4</sub>C**

MENSLDSDGTEIVATQKIEETVKSILSESDMDQTEFKLRDLASAKLGLDLSGTNHKKLVRDVLVFLSTPGEALVPETVAPAKNE  
TVSVAASVGGEDERFICKLSEKQNAVQRYRQGFFLSIGSQEHGKAFRGAHLSTNQWVSVIKNFADIEDGIKQCQSKLSEARNGDT  
TEAVDADSSHGFSVIKISRFDGKSYLYWASQMEFLKQLKLTLYVLESEPCPSIGSQGPETNPREITRADATGKKWLRDDYLCYTHLMNS  
LSDHLYRRYSQKFKHAKELWDELKVVYQCDESKSKRSQVRKYIEFRMVEERPILEQVQVFNKIADSIVSAGMFLDEAFHVSTIIISKFPF  
SWRGFCTRLMEEYLPVWMLMERVKAEEELLRNAGAKVTYRPAATGSSQOMERTPSLGTTHRGSQSVGWKRKEPERDERVIVCDNCGRKC  
HLAKHCWGSKSDERASGKSNRINSSVAAPVESETQATTNDRG

**AT4G05360 putative Rad21/Rec8-like protein; 1 CX<sub>2</sub>CX<sub>4</sub>HX<sub>4</sub>C and 1 CX<sub>2</sub>CX<sub>3</sub>GHX<sub>4</sub>C**

MGKIKDQKGEKHDHSQCRRYVLQSYLLRTEHISPSTRNINMITQDDSLCLLSISYITLNSSSHASLWLFTRSEESADFGESDPSKTV  
RKRKLLSSSKLGFRRLDNQSKDQLFNEPLFTGFSNVLLSVFKKDCVAKSYFAAPKEPASVPVSSPTREAEETEINSASPVTPQSTVPDST  
NQESTVQRSSSQQTEHFQGVALKFVLPGLNILEYMLSPPPRSSPFRTNGFTIHPETWETGSYRTQPSTSNNTTEELHFLFEEGVNTPVRSF  
VTQDSGGFSGRTRALAOHLKERYSGYLSLNKILEGKTRKIAARMFYETLGEVPEIVQKIIQEVRSQSLKSRLEMLRLPFFKRFVSWNERN  
RALHEFKVDGNKEVLYKSSKGRCFECKGFRHMCSECANLMKEKEKFIIMSDEIDSDDGEELKNLVAFTTFESSIASASAGPTSASA  
TGSTSASATGPATGSDNDQSDDDLSISDEFAENYKALYEHCVKVEENSVLTKELKLEAKVVKTLKFAAEKEEASQLEETQKNLR  
MLNNGTKKLGHILSIGKTDKGLGFKGNPSKSDPVFVYGGKITASAGTVKETATVAEIASDTRTDSRTDTTETSGRKVKQLQSEPRRV  
FRPVCHHCGVVGHIRPRCFRLLREKNRMLMNAVDRVRFHGPKCYHYGVQGHIKRNCFRFIRECSHELRRNKVWVRKDDFHGSGGENDDV  
GDVVLELELMSQHSQKGGDLKM

**AT5G20220 putative CCHC-type zinc finger protein; 4 CX<sub>2</sub>CX<sub>3</sub>GHX<sub>4</sub>C**

MRKKKTRFQFLNPNKSFVFPRAISSSSSSSDNNNDGSVSSSRQNNRQMGYDPSEELFGVDFKPRFISGDSREPRSWFGPNGQYIRE  
LPCPTCRGRGYTSCSNCGIERSRLDCPQCKGKIMTCLRCLGDCVIWEESIDERPWEKARSSSPFRVKEDDEVDNLEIKFSKRRKSKRI  
YQSPTPEVGQKISRSLKSLNAKTGLFSKRMKILHRDPVLHAQVAAIKKAKGTPAARKHASESMKAFFSNPVNREQRSLSMKGTIFYCK  
NCCQEGHRRHYCPGLGTNADRKFCRCGCGKGNRRTCPKSKSIVTKGISTRYHKCGICGERGHNSRTCRKPTGVNPPSCSGENSGEDGV  
GKITAYA CGFCKKMGHNVRTCPSKQVSDSDSCLEQEGS

**AT4G06479 protein of unknown function; 1 CX<sub>2</sub>CX<sub>4</sub>HX<sub>4</sub>C and 1 CX<sub>2</sub>CX<sub>3</sub>GHX<sub>4</sub>C**

MAKDESESTEDISIESDPSEYLESTEDANNHDGFLSSEANHVEMITTEDGELFAVPTENAEQQTNDLSLNNMLSQFYVFPSTDEKGSFG  
GNLGTIGGHLGLEEADGAFGAMNEYGADDEYDMLMLMGNVEDENGAIENEIENELEHVSLVINISLDSSHAIIIMPNSKADSCW  
EDEMFKGDEPSEDEENGRWDMLEQELNHESLMNLRLDEERSKGLVDKAGENEKWKGRKRAVEMMESEKAKDQRIVGNLHPVIGIG  
YGINSKVKPGIQATARKSVGKKLATPAKRPCETICSHTDHPTKECLYPPQTIPTDDYAKCYYCEGMGHSMYCLYIAPNAGEGSLRGGV  
PLMTTTEEKCLNE

**AT4G06526 protein of unknown function; 1 CX<sub>2</sub>CX<sub>4</sub>HX<sub>4</sub>C and 1 CX<sub>2</sub>CX<sub>3</sub>GHX<sub>4</sub>C**

MSSTKGSNIVSPLHGLNVPNLENFVLPSSIDDENVDNHDGMLSSEANHVEMITTEDGELYAVPTENATEEQACDSLNNILSRFYVFPST  
DEEGFSFVPMNGTIGEHGLEEVEVNGDMFVPLIQANGAFGAMNKYGDDEYDMLMLMGNDEEDESQVIENEIENELEQAIDKLIAYKA  
DSCWEGEMFKGNEPSEDEGNRDLDEEKSKGLVDKAEENERWKGKRAAEMGMESEKAKDQRIVGNLPLPLGMEYGINTKVKPRIQATAR  
KSVGKKLATPAKRPCETICSHTDHPTKECLYPPHTMPYMDCCARCSGCGGVGHMSMYCPYVAPNASEGSSRGVRLMTTVAEEKCLNEGM  
PSFLWVRRFKTFVKMMGEFIEVGNDSQLTAYAQTLPKLQRAKMSMNGHEWAKMGKVGRAAAKFAALPAEELTWVGHLTRGALRLNRS  
GGVTPVATCRQALLSGWLYEKFHLVEVGPETPVACGHIDICSDMWQAGIVDCGLGDSPET

**AT1G48095 protein of unknown function; 1 CX<sub>2</sub>CX<sub>4</sub>HX<sub>4</sub>C**

MSDFENIVLPSSCDSQVTAWPVLELDFNQDTSTYVAFIRVKIRLVFTDRLRFRFRVRFESREGAMIGFEYEKLRITCTNCCRITHVNN  
CPFLNAPVIHDEVEVLDVPVWEEGAASNTITDQTHMTSSDSSDISASLISQPLPPASLASHEPHLVAGSEASRLVNPRIPIQNHSS  
SSSDFKGGKAKMEIGECSSKRRKDKQVDDALRNVRQCRKDQIRIMILQINLDIELASFVRTAGAVASHKMMKLLTFFSTVVLRRSKY  
SILDDLEGYITSGVYTYKVTISTKLIKIFSLYFHLF

**AT5G13920 protein of unknown function; contains GRF-type zinc-binding domain; 1 CX<sub>2</sub>CX<sub>3</sub>GHX<sub>4</sub>C**

MLNGTMTQTDGCFRCRQAGHWINDCPLKSYTDDPPAIQPCGGGFCEIKVANTRENPRKFKYKPTAQNCCFFKWC DKVTDEDIKFRPA  
FTIPIPCSGAGPCRRVKDVSGRAYLICCIKKGFGACGFFKWEDVEMIPSCDVMDEIDFWVEADQILSDVESSLQARGGVIPEIANQMAS  
EKECQASVSGIEDDCVVECQDSVSAEDDSTLENLDSISMSVSDVHSTALNQGISLFDVPTSEPEEPWKKTQNGDQPTNSALS KLSVDEA  
MSDLIRDTVSSGVSVIHGRTNHEQPEIDGAEWSFCLQNLIDQYNSEKLQLESISGKHVQMLESEFMASYRRLRLHEKTSHLRKTLLT  
EKEMVCCEAETLKFASCREVAGEMAESQKRMQETADKLGKEVEVFKQNEFVGLKRRRT

**AT5G34870 protein of unknown function; 1 CX<sub>2</sub>CX<sub>3</sub>GHX<sub>4</sub>C**

MSSSKGSNTVSLHSVNPVPLENSAPSSSTDESFLVAMNDQFMAEDSDSTESDTSIESDPSDVWKLFAVPTENATEEQVNDLSLNNMLT  
QFYVFPSTDEEGSFGVPNLGTIGEHGLKLEELNADLFDVPVIHANGAFGAMNEYGANDEYEMLMMLMGNKEDENEAIENELEHAIDQLIA  
ECAQDFGLIGEGGGNGNDGGDSSDSFESLTLEPKSPSVINISDSSQPIVMMLNPSKPESCWEIEMFKGDEPSEEEGRGRWDPMLE  
QELNHEYLMLNRLKLDEERSKEKMAQRIVGNLHPLRIGYINSKVKPRIARATARKSVRRKLPKPAKRPWEICGYIDHPTQCLHPPQAM  
PYMVDCAKCYSCGGVGHVSMYCPYLAPNAGEGSSRDALVFMGGETSHERRHEGDSKTFVKMSEEFVGDMMRKSCLNAWPIDRMCP  
KPAKGGDQEWARMGDKGSWACRGRNFPVCRVQNRHVWTPHLRCLAAQVTNLGAKVGLVLEPKLAESWSRS

**AT5G36240 putative CCHC-type zinc finger protein; 4 CX<sub>2</sub>CX<sub>3</sub>GX<sub>4</sub>C**

MIKLPNPISRVCDPLIMPRHNDDEAEVCLRCGGFGHDMTLCKEYESHEDLNKIKYVCNSLGHLCCEPFGHTQSWTVSCYRCGQLGHTG  
LACGRHYDSSVSPSCFICGREGHEHQCHNSFSVCFPEDSSEDECQGPDSSSVRFQENTREEEEGHFEHQCPDSSVCFQEI SREEGFI  
SLNSSSKSTSGRETRRLCYECKGKGIARDCPNSSQVVISLSLTFICALSSSVLSFLSCYYSRINFLCFFQDKYGI

**AT5G49400 zinc knuckle (CCHC-type) family protein; 1 CX<sub>2</sub>CX<sub>3</sub>GHX<sub>4</sub>C**

MSNSKDEKSQDAADRKAATLTAAKGLSRTQAERAAAAARNVNAVYGOKEEGPSRWQEKRELRQMYLMSTEKAVRLGERKDKTMSASA  
VGSSASAASQCKCFQAGHWTYECKNERVYISRPSTQQLKNPKLRTKPSVDDLDGSDDDDEERPDATNGKAEVEKRSKSKRKHRSK  
SDSESDSEASVFETDSDGSSGESSEYSSSSDSEDERRRRRKAKSKKKKQKQKERRRRYSSSSSESESESASDSDSEDRSRRKKS  
KRHSNKRR

**AT5G52380 CCHC-type zinc finger protein; 3 CX<sub>2</sub>CX<sub>3</sub>GHX<sub>4</sub>C and 2 CX<sub>2</sub>CX<sub>4</sub>HX<sub>4</sub>C**

MVNQRRRLAQRYKEANPELFPKAEPTPPKDPNKKKKKSLFKKKKPGSSTRPQRTGSSTRHPLRVPGMKPGECCFICHSKTHIAKLC  
PEKSEWERNKICLQCRRRGHSLKNCPEKNNESSEKLCYNCGDTGHSLSHCOPYMEDGGTKFASCFICKGQGHISKNCPENKHGIYPMG  
GCCVKVCGSVAHLVKDCPDKFNQESAQPKKTSRFDATPRGKLTKFSGDDLEDDFTEEPKSSKINTSDDSAQNSVEVKKKQGPKI VNFV  
G

**AT2G01050 protein of unknown function; 1 CX<sub>2</sub>CX<sub>3</sub>GHX<sub>4</sub>C**

MLDVGEKGRPPGDPDKLESWATKVKGSAGGGILKPEDVIDDEFVRRERVGLEFPDGEDEEPIITIGEEVLEAMNGLWKKCMIVKVLGSO  
IPI SVLNRKRLRELWKPSGVMVTMDLPRQFFMIRFELEEEYMAALTGGPWRVLGNLLVQDWSSRFDPLRDDIVTTPVWVRLSNIPYNY  
HRCLLMEIARGLRPLKVDMMNTINFDKGRFARVCIENVLAKPLKGTVLINGDRYFVAYEGLSKI CSSCGIYGHVHSCPRNVVVKVSAG  
AETVTDRAVVPVGMEDDGFVTVVQRTARRPAAFPQKMFVAVGASGGRSKQRLRELPKNQGVDLANRFGGLDGNGLDPLDLREVAITEGPN  
KENEYHGRNVGKVMGVPLVKEARGSTQMEKGGKGGFKWKRNGMKALEPIGPKQKHGAANKPARGLIFGPTKDANSVPVGEDLLSN  
GKRLRVEQRDVGRRPGGVYSSAMGSHAHEASFDLSDSSTLSQRFQREDLMSEIAVVSHEGSEVGNSSSEGMA

**AT5G36228 protein of unknown function; 1 CX<sub>2</sub>CX<sub>4</sub>HX<sub>4</sub>C**

MSDELWNAIQHMDLGREEPELYIPYHAYV GALASNRLSLLGRILNPQTQSVERAILELPYQWGLGTQVHGRILDDRCFQVFRSEIDLL  
NGLRRAPVWFNEWFIALQRWEDFPTDFLTFIDVWVHIRGIPLPYVSERTVEIIASTLGEVVMDFNEETTSQITFIRVKVRMDFTEPL  
RFFRRVRFASRERAMIGFYEYELQRVCTNCCRVNHQVSHCPYVHQQEEMDNEPDLVSPERYDDEDSL NQEDHGHRHSQSSVSISSFSILT  
PISL NAPPVWNWDMIGNI PHRFPTSVSSHTVSDGYLAASEWRPKDQVSYEVGESSKRKKGKQVLEVPERSIRQRRMGSGIRFYPV  
NGENP

**AT2G07760 protein of unknown function; 1 CX<sub>2</sub>CX<sub>3</sub>GHX<sub>4</sub>C**

MNSVSVLTQKTEVGVKVVVDSSNVNSVPDPRWPYLTRWTQNSPSPSPSIVISPSISLVKPLTIGSSPKIARSSSLDFVNLTSLLDST  
LPVTVEPIEIHVVSITSLSYSAEVS LPTSALPPIVSATLDESIA PVKLVSP TLKGAWAKQLKFTSSSASQDVGAPMQSHLEATKEDN  
VRFPAAKMDPAARNLYRATSEPFMEDGIPKRGWLHVDDCLMFVAPWSTVNTFDLPEIISTIPVWVTLKNI PNRLYSILGISHIASGLGA  
PMATYKPRLDPSLMSEANILVEVELSKAFPPRIAAVDKKGNI SMVNVYAWIPAKCGKCCQLGHKASRCMKPHLAHEKVTEIVSEEIIT  
PAIVSLASATNLVSPITLQTKTPI DVPITNSKI QIDTVFDIEAGPIQDKDNC TGVADCFTNVEAEVVTETCTVESVFEIAGTKDKFSR  
LGSSFPDGDLSHSEDSIVSVESDSGSELMEMLTTPSGQRLLRERFPVKPSIKAKEIQASSTTRGRGNRGRGNRGNRGNRGRG

**AT3G24070 protein of unknown function; 1 CX<sub>2</sub>CX<sub>4</sub>HX<sub>4</sub>C**

MWLKIRGIPIQYLC DGTVREIASSMGEVMEVELDDGMVDLSSVRARVNVCDTRLCFKKVARFDSGEVKIVSFRYEDIGMSKARFKFCF  
NCCDMNHLARNCLIPWVDVDPYERSLSPPHESNSDGSAGNCGDGGTSSGTLELLELVDAVQDFPVGDGEQLELAGVVQDLPVGDGE  
QQOQLDGV EEANATQVDSEMVGISSEGSKRKFDAVEQGDENPEKRLRGITDATEGGSTDATEEGGLVSLKPLQGE

**AT3G31430 protein of unknown function; 1 CX<sub>2</sub>CX<sub>4</sub>HX<sub>4</sub>C**

MATDKAICRRLLYLFTVPLVTVYREFAGKVVCFHTAHSLVVISTVESTIHRDATSSASGNVLLKFRFTIPESTNLISLKPNNHFPLRF  
YQPLSQMADNLRRAVQDINLGVDDIPFALPEDIVNHAVAENRFLFGRPVMPRRQNLRSIVASMPRIWQSGLVHGRIMEGRQFHFI FT  
LEESLETVLRGPWAFNDWMILLQRWEPQIPLFPPIPFVWQIRGIPFQFLNRGVVEHIGRALGQVLDTFNVEVVARMDFARVLLHWDI  
THPLRFQRHFQFTAGVNTLLRFYERLRGFCEVCGMLTHDFGACLIONGGEEQADDDDDDEEHPQTYHN

**AT3G42140 protein of unknown function; 1 CX<sub>2</sub>CX<sub>4</sub>HX<sub>4</sub>C**

MADNLQRQMQEIALGVQEEANLLIELCDEALRKPNLASLQNRCPKNVDEEVVGRILEIHKIEFLFQSEESMFSILRRGPWSFNDWMCV  
IQRWTKLHSDAEFKRIPFWIQRIGIPLRFLTARIITSIGERMGLFLETNLGRDVSVLKFQYKLNKFCCTTCGMLSHDASECPTSNGQGP  
HADDDDDDDNDANEDHPDVPDGNPDQVHGPMNQHPPEESTEDHQNAPKRGKLP LLQRLTMEVPWCVATCARPMPQKILNTAWLKDR  
EGNHKF

**AT5G32613 protein of unknown function; 1 CX<sub>2</sub>CX<sub>3</sub>GHX<sub>4</sub>C**

MPKKKSVRPSWPPIPSKFFRVAVSSAPGSSVSSVPSVLSVCGADASSTLVEMNVRPSSPKVLGSMLELCQDIVPLTSFDLVEVLD  
KSVKLPPEARISSEIAVPVSENSSIGTVELEQGEITSATAPELEISSVPVDTLINSSFDRI TNPSPTSSKGPLWMTPTSTFLEDGTPMV  
VAPASVLLKTAEMSLWEHYGSSVLEDGGVDFHSFSKSPMGESPLEPQELQTAQTWAILKNVPPQLYSLEGISVIASGIGEPLHTEKSR  
LGPVNI GRTKVKVVTNLGTPLPDSIVVRDQGN TARVAVTYPRPPPKCLNCGRYGHLLSRC SKPLMKKLPFKKDLPSGSKEVQILVISL  
PTSQEAQRGIMLESSIEDQKTTTQAKSKRRSRSKRSASLPSASIGPLEIQKGVKEKSDRLAAVAKPKWIVKADV KRPGTASQPTL  
SSPTIIDASCEL

**AT2G17920 Nucleic acid binding/zinc ion binding protein; 1 CX<sub>2</sub>CX<sub>4</sub>HX<sub>4</sub>C**

MADLWDEIQNLELRQEGPSLFI PNEAYIMVAGRNLSTIARPLNPRVQNLQAIITALPRAWGLTAHVHGRIIDDTYVQFLFQSEMDLL  
SVQRREPWLFNNWFVASQRWQPAPALNFVTTIDLWVQMRGIPFLYVSEETALEIAQEIGAIISLDFHDTTSTQIAYIRVVRVVGITDSL  
RFFQRITFESGESALIRFQYERLRRI CSNCFRFTHNRYC PYRPRVQILDRERAAHDSVLRSSNNSQSQMTESFPAPLTPPPRVAP  
PLNHQELAAATPYFPSKNCSFPALHSSYYSKWYWTSSFF

**AT3G21000 Gag-Pol-related retrotransposon family protein; 1 CX<sub>2</sub>CX<sub>4</sub>HX<sub>4</sub>C**

MATANIRDGVSDQFDYEIWAPITKSTLIEQGLWVNVNGVPQDPSKNPELAATIQPEELSKWRDFVVKDAKALQILQSSLTDSVFRKTL  
LSASSAKDVWDLRRKGNQATIRRLQVTTIRRLKQLEDLKMVDKESGSSYLDKALEILERLGRAKLEKSDYEICKNVFTTSLGSGFDGL  
DSMLEELIDVHKMTSKSLVEYFYRVHESSTEEAIFGLLKDRLKSKSEKWCGLYKNNHNQEDCKFRIHTDKEEKEDEIVVDYRLETV  
PNLGAKTYYDDIWI IHKMAPINMTPYVKYFTTLDRTFKATVGTVDGTVLLVEGKGDVVKIRMKEGKKKTIRNVI FVPGLNRRNVLSFGKMV  
SKRYSISTGMQGEICVCDRGENKLGDMWMTDETEMALRLKVI EGKLTLY

**AT5G18636 Ta11-like non-LTR retrotransposon; 1 CX<sub>2</sub>CX<sub>4</sub>HX<sub>4</sub>C**

MADELWDEIQNLELQGEDPALFI PHEAYVMVEASNNLSLIARPLNPRVQNLNSVVVALPRSWGTLTQVHGRVLDATYVQFVFANEIDLM  
MVQRREPWL FNNWFVAATRQVAPAHNLVTTIDLWVQIRGIPLPYVSEETVLEIAQDLGEEIISLDFHEATSPQIAFIRVVRVFGITDRL  
RFFQRIIFDSGETATIRFQYERLRLRCSSCFRFTHNRAYCPYRQRSLSIARERALEFCDVQRSSMNSQSOMTESSEFFVPMTPPPVDPP  
PMNHSEFVAAYPHLATATNVNRYRFTGDSSTSRQDLSSGSNNILPRRTTHFTDHRRCFEAGQSSRQENREPRRPTERMLPPSHFDHVQR  
SGGILKPPKKR

**AT5G25200 Ta11-like non-LTR retrotransposon; 1 CX<sub>2</sub>CX<sub>4</sub>HX<sub>4</sub>C**

MADELWDEIQNLELQGEDPALFI PHEAYVMVEASNNLSLIARPLNPRVQNLNSVVVALPRSWGTLTQVHGRVLDATYVQFLFANEIDLM  
MVQRREPWL FNNWFVAATRQVAPAHNLVTTIDLWVQIRGIPLPYVSEETVLEIAQDLGEEIISLDFHEATSPQIAFIRVVRVFGITDRL  
RFFQRIIFDSGETATIRFQYERLRLRCSSCFRFTHNRAYCPYRQRPLSIARERALEFCDVQRSSMNSQSOMTESSEFFVPMTPPPVDPP  
PMNHSEFVAAYPHLATATNVNRYRFTGDSSTSRQDLSSGSNNILPRRTTHFTDHRRCFETGQSSRQENREPRRPTERMLPPSHFDHVQR  
AGGILKPPKKR

**AT2G13450 Ta11-like non-LTR retrotransposon; 1 CX<sub>2</sub>CX<sub>4</sub>HX<sub>4</sub>C**

MADELWDELQHELGREDPALFI PHEAYAVESENRSLIARPLNPRSQNLHAVISALPRAWGLTNRVHGRVLDNDFVQFIFQSEIDLL  
SVLRREPWLYNWFVTAQRWEVNLTFHLLTSIELWVQMRGIPLLYVCEETALEIAHELGEIITLDFHDSSTTQIAYIRVIRFGITDRL  
RFFLRIFDSGETALISFQYERLRLRCSSCFRMTTHHRNSCLYRQIESLHRVTNTTAQRNVREEVFMRDENLRSSMNSQSOMSESSFPTP  
IDPPPRI PHPPPLNDELVAAYPHTRATSLPNFAGPLPQVPLRRNVDERDSNIQPFSGPAFAAHS PRLVEVGESSRQENTQNVHTVEK  
GDSSKRKNMGGPKFKDDARKSNEDEHMNGGILKPPKKR

**AT2G16676 Ta11-like non-LTR retrotransposon; 1 CX<sub>2</sub>CX<sub>4</sub>HX<sub>4</sub>C**

MRGIPLLYVCEATVTEIALGLGQIISLDFHDATTTQIAFIRVIRFEITDRIRFFQRIITFDSGETALIRFQYERLRLRCSSCFRLTHHR  
NYCPYRQPEPRSIIRGPTNLRSRREGVCTRDEYHRSSLNSQSOMSENAFPAPIEPPRVAAPPLNPEFRAAYFPEGRAGSLPNIGT  
LNLNPPSRRQEASRNSNVQPF TGPAGANVPRVVEVGECS

**AT2G41590 Ta11-like non-LTR retrotransposon; 1 CX<sub>2</sub>CX<sub>4</sub>HX<sub>4</sub>C**

MSDELWNEIQNLELQGEDPALFI PHEAYVMVEATNRLSMIARPLNPRVQNLNSVVVALPRTWGLTNQVHGRI LDATYVQFLFQNEIDLM  
MVQRKEPWL FNNWFVAATRWEVAPAHNFVTTIDLWVQIRGIPLPYVSEETVMEIAQDLGEVLMMLDYHDTTSIQIAYIRVVRVFGITDRL  
RFFQRIVFDSEGETATIRFQYERLRLRCSSCFRFTHNRAYCPYRPRPLSIARERALEFRDSVHRSSMNSQSOMTDSSEFFIPQTPPPRISHP  
PLNHDEFVAAYPHLDSGRNDHIRCEGESSNFRQDLSSASNSITPREPQYLTDRRHFEFGQSSRRHDVDRDLRSGSERIGNLNQOQNYVQR  
SGGILKPPKKR

**AT3G47920 Ta11-like non-LTR retrotransposon; 1 CX<sub>2</sub>CX<sub>4</sub>HX<sub>4</sub>C**

MLDATYVQFLFQNEVDLLSVQRRELWLFNNWFVANHRWEPAPVLFVTTIDLWVQMRGIPLLYVCEETALEIAHEIGEITLDFHDATM  
TQIAYIRVVRIGITDRLRFFQRIITFDSGETALIRFQYERLRLRCSSCFRVTHHRNYCPYRPRLPNYGRERAVFHDRLRSMNSQSOM  
TESSFPAPVLP PPRIVTPPLNHGEFLAAHPNFAPREGLNHQGRGTYTQGLCQGGQVSTDSNITPSVGTALSTGSRRVFEVGGSSRGVE  
TRETRKRQEEKGTHDEQDKAHMKGILNPPKKR

**AT4G02000 Ta11-like non-LTR retrotransposon; 1 CX<sub>2</sub>CX<sub>4</sub>HX<sub>4</sub>C**

MTSLTIDLLSVLRREPWLYNWFVTTTHRWEVNLTFHLLTSIELWVQMRGIPLLYVCEETALEIAHELKILTLDFHDSSTTQIAYIRVR  
IRFGITDRLRFFQRIIFDFGEAALISFQYERLRLRCSSCFRMTTHHRNSCPYRQIEPLHRVTNSTAQRNVREEVFMRDENLRSSMNSQSQ  
MSESSFPTPIDPPPRI PHPPPLNDELVAAYPHTRATSLPNFAGPLPQVPLRKNVDERDSNIQPFSGPAFAAHS PRLVEVGESSRQGEN  
TQNVHTVEKGDSSKRKNMGGPRFKDDARKSNEDEHMNGGILKPPKKR

**AT2G02103 Ta11-like non-LTR retrotransposon; 1 CX<sub>2</sub>CX<sub>4</sub>HX<sub>4</sub>C**

MADELWDEIQNLELQGEDPALFI PHEAYVMVEASNNLSLIARPLNPRVQNLNSVVVALPRSWGTLTQVHGRVLDATYVQFLFANEIDLL  
MVQRREPWL FNNWFVAATRQVAPAHNLVTTIDLWVQIRGIPLPYVSEETVMEIAHDLGEIISLDFHEATSPQIAFIRVVRVFGITDRL  
RFFQRIIFDSGETATIRFQYERLRLRCSSCFRFTHNRAYCPYRQRPLSIARERALEFCDVQRSSMNSQSOMTESSEFFVPLTPPPVDPP  
PVNHAFTAAYPHLATATNENHRDVGESSTSRQDMSSGSNNFLARRTTHFTDHRRCFEGGQASRQENREPRRPTERMRSPTHFHDHVQR  
SGGILKPPKKTNLNSIVFCHFLGKIAGLEASQLQDEEACLVGYGFWL

**Supplementary Figure 2.** Arabidopsis ZCCHC domain-containing proteins. The number of CX<sub>2</sub>CX<sub>4</sub>HX<sub>4</sub>C or CX<sub>2</sub>CX<sub>3</sub>GHX<sub>4</sub>C sequences in each protein is shown; these sequences have been highlighted. The Arabidopsis Genome Initiative (AGI) gene identifier (ATNGNNNNN) is shown, together with the TAIR10 annotation or protein name. A slash separates alternative names given by different authors to the same protein.

**AIR1/ZCCHC7; 4 CX<sub>2</sub>CX<sub>3</sub>GHX<sub>4</sub>C**

MMFGGYETIEAYEDDLYRDESSSELSVDSEVEFQLYSQIHYAQDLDVIREEEHEEKNSESSSSKPNQKLVLSVSDSEVIQLSDGS  
EVIITLSDSDSIYRCKGKNVRVQAQENAHGLSSSLQSNELVDKCKSDIEKPKSEERSGVIREVMIIEVSSSEEEESTISEGDNVESWML  
LGCEVDDKDDDDILLNLVGCENSVTEGEDGINWSISDKDIEAQIANRTPGRWTRQRYYSANKNIICRNCDKRGHLSKNCPLPRKVRRCFL  
CSRRLHLLYSCPAPLCEYCPVPKMLDHSCLFRHSWDKQCDRCHMLGHYTDACTEIWRQYHLTTKPGPKPKTPSRPSALAYCYHCAQK  
GHYGHCECPEREVYDPSVSPFICYDDKYEQERERKRLKQIKVLKKNQVIPEPSKLPYIKAANENPHHDIRKGRASWKSNRWPQENKE  
TQKEMKNKRNWEKHKRADRREVDDEDFRGPKTYSSPGSFKTQKPSKPFHRSSHYHTSREDKSPKEGKRGKQKKKERCWEDDDNDNL  
LIKQRKKKS

**AIR2/ZCCHC8; 1 CX<sub>2</sub>CX<sub>4</sub>HX<sub>4</sub>C**

MAAEVYFGDLELFEFDFHPEESI PKPVHTRFKDDDDGDEEDENGVDGDAELRERLRQCEETIEQLRAENQELKRKLNILTRPSGILVNDTK  
LDGPILQILFMNNAISKQYHQEIEEFVSNLVKRFEEQKNDVEKTSFNLLPQPSSIVLEEDHKVEESCAIKNNKEAFSVVGSVLYFTNF  
CLDKLQPLLNNENPQLSEGWEIPKYHQVFSHIVSLEGOEIQVAKRKPKECFNCGSEEHQMKDPMRPNAAI SEKRKEYMDACGEANN  
QNFQORYHAEVEERFRFKPGVISEELQDALGVTDKSLPFIYRMRQLGYPPGWLKEAELENSGLALYDGDGTDGETEVEIQONKS  
VTYDL SKLVNYPGFNISTPRGIPDEWRIFGSI PMQACQKQDFANYLTSNFQAPGVKSGNKRSSSHSSPGSPKKQKNESNSAGSPADME  
LDSMEVPHGSQSSESFQFPLPDPPTPLPRGTPPPVFTPLPKGTPPLTPSDSPQTRTASGAVDEDALTLLELEEQQRRIWAALQEA  
ESVNSDSDVPDTPLTGNVASSPCPNELDLPVEGKTSKQTLDEPEVPEIFTKKSEAGHASSPDSEVTLSCQKEKAEALAPVNTGAL  
LDNGSVVPCNDISNGGSQKLFPADTSPSTATKIHSPIPDMSKFATGITPFEFENMAESTGMYLRIRSLKNSPRNQKKNKASE

**CLIP1/CLIP-170; 1 CX<sub>2</sub>CX<sub>3</sub>GHX<sub>4</sub>C**

MSMLKPSGLKAPT KILKPGSTALKTPTAVVAPVEKTI SSEKASSTPSSSETQEEFVDDFRVGERVWVNGNKPFGIQLGETQFAPGQWAG  
IVLDEPIGKNDGVSAGVRYFQCEPLKGI FTRPSKLRKVKQAEDEANGLQTT PASRATSPLCTSTASMVSSSPSTPSNI PQKPSQPAAKE  
PSATPPI SNLTKTASESISNLSEAGSIKKGERELKIGDRVLVGGTKAGVVRFLGETDFAKGEWC GVELDEPLGKNDGAVAGTRYFQCP  
KYGLFAPVHKVTKIGFPSTTPAKAKANAVRRVMATTSASLKRSPSASSLSSMSVASSVSSRPSRTGLLTETSSRYARKISGTTALQEA  
LKEKQOHIEQLLAERDLERAFAKATSHVGEIEQELALARDGHDQHVLELEAKMDQLRTMVEAADREKVELLNQLEEEKRKVEDLQFRV  
EESITKGDLEQKSQISEDPEPTQTKLEHARIKELEQSLLEFKTKADKLORELEDRVATVSEKSRIMELEKDLALRVQEVAEALRRRLE  
SNKPAGDVMSLSLLQEISSLQEKLEVTRTDHQREITSLKEHFAGAREETHQKEIKALYTATEKLSKENESLKSLEHANKENSVDIALW  
KSKLETAIASHQAMEELKVSFSKGLGTETAFAELKTQIEKMRDLYQHEIENLQONQD SERAAHAKEMEARAKLMKVIKEKENSLEA  
IRSKLDKAEDQHLVEMEDTLNKLQEAIEKVKLEVLQAKNEQTKVIDNFTSQLKATEEKLDDALRKASSEKSEMKKLRQLEAAE  
KQIKHLEIEKNAESSKASSITRELQGRELKLTLNQLSEVSVQKETLEKELQILKEKFAEASEEAVSVQRSMQETVNLKHQKEEQFM  
LSSDLEKLRNLADMEAKFREKDEREEQLIKAKEKLENDIAEIMKMSGDNSQLTKMDELRLKERDVEELQLKLTKANENASFLQKSI  
EDMTVKAEQSQEAAKHEEKKELERKLSLEKMETSHNQCQELKARYERATSETTKKHEEILQNLQKTLLEDTKLKGAREENSGL  
LQELEELRKQADKAKAAQTAEDAMQIMEQMTKEKTETLASLEDTKQTNAKLQNELDTLKENNLKNVEELNKSKEKLLTVENQKMEFRKE  
IETLKQAAAQKSQLSALQENVKLAEEGRSDEVTSHQKLEERSVLNNQLEMMKKRESKFIKDADEEKASLQKSI SITSALLTEKD  
AELEKLRNEVTVLRGENASAKSLHSVVQTLSDKVKLELKVKNLELQLKENKRLSSSSGNTDQADEDERAQESQIDFLNSVIVDLQR  
KNQDLKMKVEMMSEALNGNGDDLNNDSDDDQEKQSKKPRFLCDICDFDLHDTEDCPTQAQMSDPPHSTHHSRGEERPYCEICEM  
FGHWATNCNDDETF

**CNBP/ZCCHC22/ZNF9; 7 CX<sub>2</sub>CX<sub>3</sub>GHX<sub>4</sub>C**

MSSNECFKCRSGHWARECPTGGGRGRGMRSRGRGGFTSDRGFQVSSSLPDI CYRCGESGHLAKDCDLQEDA CYNCRGGGHIAKCKE  
PKREREQC CYNCGKPGHLARDCHADEQK CYSCEFGHIQKDC TKVKCYRCGETGHVAINC SKTSEVNCYRCGESGHLARECTIEATA

**CPSF4; 1 CX<sub>2</sub>CX<sub>3</sub>GHX<sub>4</sub>C**

MQEI IASVDHIKFDLEIAVEQQLGAQPLPFGMDKSGAAVCEFFLKAACGKGGMCPFRHISGEKTVVCKHWLRLGLCKKGDQCEFLHEYD  
MTKMPECYFYSKFGECSNKECPFLHIDPESKIKDCPWYDRGFCKHGPLCRHRHTRRVI CVNYLVGFCPEGPSCFMHPRFELPMGTTEQ  
PPLPQQTQPPAKQSNPPQLRSSLIQLTSQNSSPNQRTQVIGVMQSONSSAGNRGPRPLEQVTCYKCGEKGHYANRCTKGHLAFLS  
GQ

**DDX41; 1 CX<sub>2</sub>CX<sub>3</sub>GHX<sub>4</sub>C**

MEESEPERKRARTDEVPPAGGRSEAEDDEDYVPYVPLRQRRLQLLQKLLQRRRKGAAEEEQD SGSEPRGDEDDIPLGPQSNVSLLD  
QHQLKEKAEARKESAKEKQLKEEKILEVAEGRALMSVKEMAKGITYDDPIKTSWTPPRYVLSMSEERHERVRKYYHILVEGDGIPP  
PIKSFKEMKFPAAILRGLKKGKGIHHPTPIQIQIPTILSGRDMIGIAFTGSGKTLVFTLTPVIMFLEQEKRLPFSKREGPYGLIICPSR  
ELARQTHGILEYCRLLQEDSSPLLRCALCIGMSVKEQMETIRHGVMHMVATPGRMLDQLQKMSLDICRYLALDEADRMIDMGFEG  
DIRTIFSYFKGQRQTLFSATMPKKIQNFAKSALVKPVTINVGRAGAASLDVIEQVEYVKEEAKMVYLLECLQKTPPPVLIFAEKKADV  
DAIHEYLLKGVAVAIHGGKQDEERTKAI EAFREGKDVLVATDVASKGLDFPAIQHVINYDMPEE IENYVHRIGRTGRSGNTGIATT  
FINKACDESVLMDLKALLLEAKQKVPVVLQVLHCGDESMLDIGGERGCAFCGGLGHRITDCPKLEAMQTKQVSNIGRKYLAHSSMDF

**LIN28A/ZCCHC1/CSDD1; 2 CX<sub>2</sub>CX<sub>4</sub>HX<sub>4</sub>C**

MGSVSNQQFAGGCAKAAEEAPEEAPEDAARAADPQLLHGAGICKWFNVRMGFGFLSMTARAGVALDPPVDVVFVHQSKLHMEGFRSLKE  
GEAVEFTFKKSAKGLSIRVTGPGGVFCIGSEERRPKGKSMQRRSKGDR CYNCGGLDHHAKECKLPPQPKKCHFCQSI SHMVASCPLKA  
QQGPSAQGKPTYFREEEEEIHSPTLLPEAQN

**LIN28B/CSDD2; 2 CX<sub>2</sub>CX<sub>4</sub>HX<sub>4</sub>C**

MAEGGASKGGGEEPGKLPPEAEESQVLRGTGHCKWFNVRMGFGFISMINREGSPLDIPVDVVFVHQSKLFMEGFRSLKEGEPVEFTFKK  
SSKGLSIRVTGPGGSPCLGSEERRPKGKTLQKRKPKGDR CYNCGGLDHHAKECKSLPPQPKKCHYCOQSI MHMVANCPHKNVAQPPASSQG  
RQEAESQPCSTLPREVGGGHCTSPFPQEARAEISERSGRSPQEAASSTKSSIAPEEQSKKGPSVQKRKKT

**pNO40/ZCCHC17; 1 CX<sub>2</sub>CX<sub>3</sub>GHX<sub>4</sub>C**

MNSGRPETMENLPALYTI FQGEVAMVTDYGA FIKIPGCRKQGLVHRTHMSSCRVDK PSEIVDVGDVWVKLIGREMKNDRIVKVSLSMKV  
VNQGTGKLDLPNNVIEQEERRRRSFQDYTGQKITLEAVLNTT **CKKCGCKGHFAKDC**FMQPGGTYSLIPDEEEKEEAKSAEFEKPDF  
TRNPSRKRKKEK KKKKHRDRKSSDSDSSDES DTGKRARHTSKDSKA A KKKKKKKKKKKKKHKE

**RBBP6; 1 CX<sub>2</sub>CX<sub>3</sub>GHX<sub>4</sub>C**

MSCVHYKFSSKLNVDYTFDGLHISLDC LKKQIMGREKLKAADCDLQITNAQTKEEYTD DNALIPKNSSVIVRRIPIGGVKSTSKTYVI  
SRTEPAMATTKAIDSSASISLAQLTKTANLAEANASEEDKIKAMMSQSGHEYDPINYMKKPLGPPPPSYT **CFRCGKPGHYIKNC**PTNG  
DNFESGPRIKKSTGIPRSMMEVKDPNMKGAMLTNTGKYAIP TIDAEAYAIGKKEKPPFLPEEPSSSEEDDPIPELCLCLICKD IMT  
DAVVIPCCGNSYCECIRTALLE SDEHTCPTCHQNDVSPDALIANKFLRQAVNNFKNETGYTKRLRQQLPPPPPIPPRPLIQRNLP  
LMRSPISRQDPLMIPVTSSSTHPAPSISSLT SNQSSSLAPPVSGNPSSAPAPVPI TATVSVHSEKSDGPF RDNDKNILPAAALASE  
HSKGTSSIAIT ALMEEKGYQVPLGTPSLLGQSLLHGQLIPTTGPV RINTARPGGGRPGWEHSNKLGYLVSPQQIRRGERSCYRSINR  
GRHHSERSQRTQGPSLPATPVFVPPPPPLYPPPHTLPLPPGVPPPQFSPQFPQPAGYVPPPGFPAPANLSTPWVSSGVQTA  
HSNTIPTTQAPPLSREEFYREQRLKEEKKKSKLDEFTNDFAKELMEYKIKQERRRSFSRSKSPYSGSSYSSSYTYSKRSRGSSTRS  
RSYSRSFSRSHRSYSRSPYPYPRRGKSRNYSR SRSHGYSR SRSPYRRYHSRSRSPQAFRQSPNKRNV PQGETEREYFNRYRE  
VPPPYDMKAYYGRSVDFRDPFEKERYERWERKYREWYKYG YAAGAQP RPSANRENFS PERFLPLNIRNSPFTGRREDYVGGQSHR  
SRNIGSNYPEKLSARDGHNQDNTKSKKESE NAPGDGKGNKHKHRKRKGESEGF LNPELLET SRKSREPTGVEENKTD SLFVLP  
RDDATPVRDEPMDAESITFKSVSEKDKRERDKPKAKGDKTKRNDGSAVSKKENIVKPAKGPQEKVDGERERSPRSEPP IKKAKEETPK  
TDNTKSSSSSQDEKITGT PRKAHKS SAKEHQETKPVKEEKVKDY SKDVKSEKLT TKEEKAKK PNEKNKPLDNKGEKRKRKTEEGVD  
KDFESSMKISKLEVTEIVKPSPKRMEPDTEKMDRTPEKDKISLSAPAKKIKLNRETGKKIGSTENISNTKEPSEKLESTSSKVKQEK  
VKGKVRKVTGTEGSSSTLDVY TSTSSTGGSPVRKSEKTDTKRTV IKTMEYNNDN TAPAEDVI IMIQVPQSKWDKDDFESEEDVKS  
TQPISSVGKPA SVIKNVSTKPSNIVKYPEKESE PSEKIQKFTKDV SHEIIQHEVKS SKNSASSEKGTKDRDYSVLEKENPEKRKNSTQ  
PEKESNLDRLNEQGNFKSLSQS SKEARTSDKH DSTRASSNKDFTPNRDKKTDYDTREYSSSKRDEKNELTRRKS DSRNKDSASGQKN  
KPREERDLPKKGTGDSKKSNSPSRDRKPHDHKATYDTKRNEETKSV DKNPCKDREKHVLEARNNKESGKLLY I LNPPETQVEKEQ  
ITGQIDKSTVKPKQLSHSSRLSSDLTRETDEAAFE PDYNE SDSESNVSVKEEESGNISKDLKDKIVEKAKESLDTAAVVQVGISRNQ  
SHSSPSVSPSRSHSPSGS QTRSHSSASSAESAQS KKKKKKKEKKKHKKKKHKHAGTEVELEKS QKHKKKKSKKNKDEKEK  
EKDDQKVKSVTV

**RBM4B/LARK/ZCCHC15; 1 CX<sub>2</sub>CX<sub>3</sub>GHX<sub>4</sub>C**

MVKLFIGNLPREATEQEIRSLFEQYGVLECDI IKNYGFVHIEDKTAEDAIRNLHHYKLG VNIINVEASKNKSASTKLVGNISPTC  
TNQELRAKFEYGPVIECDIVKDYAFVHMERAEDAVEAIRGLDNTEFQGKRMHVQLSTSR LR TAPGMGDQSG **CYRCGKEGHSKEC**PVD  
RTGRVADLTEQYNEQY GAVRTPYTMGYGESMYNDAYGALDYKRYRVRYSYEA VAAAAAASAYN YAEQTMSHL PQVQSTTVTSHLNTS  
VDPYDRHLLPNSGAAATSA MAAAAAATSSYGRDRSPLRRAAMLPTV GEGYGYGPESELSQASAA TRNSLYDMARYEREQYVDRARY  
SAF

**RBM4A/LARK/ZCCHC21; 1 CX<sub>2</sub>CX<sub>3</sub>GHX<sub>4</sub>C**

MVKLFIGNLPREATEQEIRSLFEQYGVLECDI IKNYGFVHIEDKTAEDAIRNLHHYKLG VNIINVEASKNKSSTKLVGNISPTC  
TNKELRAKFEYGPVIECDIVKDYAFVHMERAEDAVEAIRGLDNTEFQGKRMHVQLSTSR LR TAPGMGDQSG **CYRCGKEGHSKEC**PID  
RSGRVADLTEQYNEQY GAVRTPY TMSYGD SLYNNAYGALDAYKRCRAARSYEA VAAAAAASVYN YAEQTLSQLPQVQNTAMASHLTST  
SLDPYDRHLLPTSGAAATAAAAAA AVTAASTSYGRDRSPLRRATAPVPTV GEGYGYGHESELSQASAA ARNSLYDMARYEREQYA  
DRARYSAF

**ZCCHC4; 1 CX<sub>2</sub>CX<sub>4</sub>HX<sub>4</sub>C**

MAASRNGFEAVEAEGSAGCGSSGMEVVLPLDPAVPAPLCPHGPTLLFVKVTQ GKEETRRFYACSACRDRKDCNFFQWEDEKLSGARLA  
AREAHNRRCQPLSRTQCVERYLKFIELPLTQRKFCQTCQQLLPDDWQGHSEHQVLGNV SITQLRRPSQLLYPLENKKTNAQYLFADR  
SCQFLVDLLSALGFRRVLCVGT PRLHELIKLTASGDKKSNIKSLLLDIDFRYSQFYMEDSFCHYNMFNHHFFDGKTALEVCRAFLOEDK  
GEGIMVTDPPFGGLVEPLAITFKKLIAMWKEGQSODDSHKELPIFWIFPYFESRICQFFPSFQMLDYQVDYDNHALYKHGKTGRKQS  
PVRIFTNIPPNKIILPTEEGYRFCSPCQRYVSL ENQHCELCNSCTSKDGRKWNHCF LCKKCVKPSWIHCSICNHCAVPDHSCEGPKHG  
**FTCGELDHKRSTC**ENIATSKRANKAVRKQQRKSNKMMETTKGQSMNHTSATRRKRRERAHQYLGS

**SF1/BBP/ZCCHC25; 1 CX<sub>2</sub>CX<sub>3</sub>GHX<sub>4</sub>C**

MATGANATPLDFPSKRRKRSRWNQDTMEQKTVIPGMPTVIPGLTREQERAYIVQLQIEDLTRKLR TGD LGIPPNEPDRSPSPEPIYNS  
EGKRLNTRFRTRKLEERHNLITEMVALNPDFKPPADYKPPATRVSDKVMIPQDEYPEIN FVGLLIGPRGNTLKNIEKCNAKIMIR  
GKGSVKEGKVRKDGQMLPGEDEPLHALVTANTMENVKKAVEQIRNLLKQGIETPEDQNDLRKMQRELARLNGTLREDDNRILRPWQS  
SETRSITNTTV **CKKCGAGHTASDC**KFORPGDPQSAQDKARMDKEYLSLMAELGEAPVPASVGS TSGPATTPLASAPRPAAPANNPPP  
SLMSTTQSRPFWMNSGPSESRPYHGMHGGGPGGPGGPHSFPHPPLSLTGGHGGHPMQHNPNGPPPPWMPPPPMPNQGPHPPGHGFP  
PMGKSVPGKYACGLWGLSPASRKYDAATYGHDAAAAAASQWAAPTSLWSSSPMATTAAAASATPSAQOQYGFYPLAMA AKIPPRG  
GDGPSHESEDFPRPLVTLPGRQPQRPPWWTGWFGKAA

**SLU7; 1 CX<sub>2</sub>CX<sub>4</sub>HX<sub>4</sub>C**

MSATVVDAVNAAPLSGSKEMSL EEPKMTREDWRKKKELEEQRKLG NAPA EVDEEGK DINPHIPQYISSVPWYIDPSKRPTLKHQRQP  
EKQKQFSSSGEWYKRGVKENSIITKYRKGAC **CENCGAMTHKKDC**FERPRRVGAKFTGTNIAPDEHVQPQLMFDYDGKRDRWNGYNPEEH  
MKIVEEYAKVDLAKRTLKAQKLQEELASGLVEQANS PKHQWEEEPNSQMEKDHNSEDEDEDKYADDIDMPGQNFDSKRRI TVRNLR I  
REDIAKYLRNLDPN SAYYDPKTRAMRENPYANAGKNPDEVSYAGDNFVRYTGD TISMAQTQLFAWEAYDKGSEVHLQADPTKLELLYKS  
FKVKKEDFKEQKESILEKYGGQEHLDAPPAELLLAQTEDYVEYSRHGTVIKQGERAVACSKYEEDVKIHNH THWGSYWKEGRWGYK

CHSFFKYSYCTGEAGKEIVNSEECIINEITGEE SVKKPQTLMLHQLKKEEKKKKKKKKKHRKSSSDSDDEEKKHEKLLKALNAEEA  
RLLVHVKETMQIDERKRPYNSMYETREPTTEEMEAYRMRQRPPDPMASFLGQ

**SREK1IP1/P18SRP; 1 CX<sub>2</sub>CX<sub>3</sub>GHX<sub>4</sub>C**

MAVPGCNKDSVRAGCKKCGYPGHLTFEFCRNFLRVDPKRDIVLVDVSTSSSEDSDEENEELNKLQALQEKRINEEEEEKKKESKEKIKLKK  
KRKRSYSSSSSTEEDTSKQKKQRYQKKEKKKESKSKGKHHKKEKKRKEKHSSTPNSSEFSRK

**SRSF7/ZCCHC20/RMB37/9G8; 1 CX<sub>2</sub>CX<sub>3</sub>GHX<sub>4</sub>C**

SRYGRYGGETKVYVGNLGTGAGKELERAFSYGFLRTVWIARNPPGFVFEFEDPRDAEDAVRGLDGKVICGSRVVELSTGMPRRSR  
FDRPPARRPFDPNDRCYECCGKGHYAYDCCHRYSRRRRSRRSRSHRSRGRRRYSRRSRSGRRRSRSASPRRSRSISLRRRSASLRRS  
RSGSIKGSRYFQSPSRRSRSRSISRPRSSRSKSRSPSPKRSRSPSGSPRRSASPERMD

**TUT4/ ZCCHC11; 3 CX<sub>2</sub>CX<sub>3</sub>GHX<sub>4</sub>C**

MEESKTLKSENHEPKKNVICEESKAVQVIGNQTLKARNDKSVKEIENSSPNRNSKKNQNDICIEKTEVKSCKVNAANLPGPKDLGLV  
LRDQSHCKAKKFPNSPVKAEKATISQAKSEKATSLQAKAEKSPKSPNSVKAEKASSYQMKSEKVPSSPAEAEKGPSLLKDMRQKTELQ  
QIGKKIPSSFTSVDKVNI EAVGGEKCALQNSPRSQQQTCTDNTGDSDSASGIEDVSDDL SKMKNDES NKENSSEMDYLENATVIDES  
ALTPEQRLGLKQAEERLERDHI FRLEKRSPEYTNCRYLCKLCLHIENIQGAHKHIKEKRHKKNILEKQEESELRSLEPPPSPAHLAALS  
VAVIELAKEHGITDDDLRVRQEI VEEMSKVITTFLEPCSLRLYGSLLTRFALKSSDVNIDIKFPPKMNHPDLLIKVLGILKKNVLYVDV  
ESDFHAKVPVVCRRDRKSGLLCRVSAGNDMACLTTDLLTALGKIEPVFIPLVLAFRYAWAKLCYIDSQTDGGIPSYCFALMVMFFLQQRK  
PPLLPCLLGSWIEGFDPKRMDDFQLKGIVEEKFKWECNSSSATEKNSIAEENKAKADQPKDDTKKTETDNQSNAMKEKHGKSPLALET  
PNRVSLGQLWLELLKFYTLDFALEEYVICVRIQDILTRENKNWPKRRIAIEDPFVSKRNVARSLSQLVYEVVERFRAAYRYFACPQT  
KGGNKSTVDFFKREKGI SNKKPVKSNMATNGCILLGETTEKINAEREQPVQCEMDCTSQRCI IDNNLLVNELDFADHGQDSSLS  
TSKSSEIEPKLDDKQDDLAPSETCLKKELSQNCIDLKSPDPKSTGTDCRSNLETESSSHQSVCTDTSATSCNCKATEDASDLNDDN  
LPTQELYVDFKFI LTSGKPPITVCSICKDGHKNDPCPEDFRKIDLKPLPMTNRFREILDVLCRCFDELSPPCSEQHNREQILIGL  
EKFIQKEYDEKARLCLFGSSKNGFGFRDSDLDICMTLEGHENAELNCKEIIENLAKILKRHPGLRNILPITTAQVIVKFEHRRSGLE  
GDISLYNTLAQHNRMLATYAADPRVQYLYGTMKVFAKRCIDGASRGLSSYAYILMVLYFLQQRKPPVIVLQEIFDGKQIPQRMV  
DGWNAFFDKTEELKRLPSLGNTESELGELWGLLRFYTEEDFKEYVISIRQKLLTTFEKQWTSKICAIEDPFDLNHNLGAGVSRK  
MTNFMKAFINGRKLFGTFFYPLIGREAEYFFDSRVLTDGELAPNDRCCRVCKIGHYMKDCPKRKSLLFRLLKDDSEEKEGNEEEK  
DSRDVLDPRDLHDTRDFRDRDLRCCFICGDAGHVRRECPEVKLARQRNNSVAAQLVRNLVNAQQVAGSAQQQGDQSIRTRQSSCES  
PSYSPQPFPQNSQSAAITQPSQPGSQPLGPPQQAQPPHQVQMPLYNFPQSPPAQYSPMHNMGLLPMHPLQIPAPSWPIHGPMVI  
HSAPGSAPSNI GLNDPSIIFAQPAARPVAIPNTSHDGHWRPTVAPNSLVNSGAVGNSEPGFRGLTPPIWEHAPRPHFPLVPASWPYGL  
HQFMHQGNARFQPNKPFYTDQRCATRRCRERCPHPPRGVNSE

**TUT7/ZCCHC6; 3 CX<sub>2</sub>CX<sub>3</sub>GHX<sub>4</sub>C**

MGDTAKPYFVKRTKDRGTMDDDDFRRGHPQDYLIIDHAKGHGSKMEKGLQKKKIPGNYGNTPRKGCAVSSNPYAFKNPIYSQPAW  
MNDSHKDQSKRWLSDEHTGNSDNWREFKPGPRI PVINRQRKDSFQENEDGYRWQDTRGCRTVRRLFKHDLTSLTSEMEAGSPENKKQ  
RSRPRKPRKTRNEENEQDGLLEGPVIDESVLSTKELLGLQQAERLRKDCIDRLKRRPRNYPTAKYTCRLCDVLIESIAFAHKHIKEKR  
HKKNIKEKQEEELLTLPPTPSQINAVGIAIDKVVQEFGLHNENLEORLEIKRIMENVFQHKLPDCSLRLYGSSSRGLGFKNSDVNID  
IQFPAIMSQPDVLLLVQECLEKNSDFSIDVDADFHARVPVVCREKQSGLLCKVSAAGNENACLTTKHLTALGKLEPKLVPLVIAFRYAW  
LCSIDRPEEGGLPPYFALMAIFFLQQRKEPLLVYLGSWIEGFSLSKLGNFNLQDIEKDVVIWEHTDSAAGDTGITKEEAPRETPIKR  
QQVSLILDVVKHQPSPVPGQLWVVELLRFYALEFNLADLVISIRVKELVRELKDWPKKRIAIEDPYSVKRNVARLNSQPVFYIILHCLR  
TTYKYFALPHKIKTKSLLKPLNAITCISEHSKEVINHHPDVQTKDDKLKNSVLAQGGATSSAANTCKVQPLTLKETAESFGSPPEEM  
GNEHISVHPENSDCIQADVNSDDYKGDVYHPETGRKNEKEKVGKRGKHLTVQDQRGEHVCGSTRNNESESTLDLEGFQNP TAKECE  
GLATLDNKADLDGESTEGTELEDSLNHFTHSVQGTSEMI PSDEEEDDEEEEEPRLTINQREDEDGMANEDELNTYTGS GDED  
ALSEEDDELGEAAKYEDVKECGKHVERALLVELNKISLKEENVCEEKNSPVDQSDFFYEF SKLIFTKGS SPTVVCSLCKREGHLKDCP  
EDFKRIQLEPLPPLTPKFLNILDQVCIQCYKDFSPITIEDQAREHIRQNLSEFIRQDFPGTKLSLFGSSKNGFGFKQSDLDVCMTINGL  
ETAAGLDCVRTIEELARVLRKHSGLRNILPITTAQVIVKFFHLRSGLEVDISLYNTLALHNTRLLSAYS AIDPRVKYLCYTMKVFTKM  
CDIGDASRGLSSYAYTLMVLYFLQQRNPPVIVLQEIYKGEKKEPIFVDGWNIIYFFDQIDELPTYWSECGKNTESVGLWLGLLRFY  
EEFDKFEHVISIRRKSLLTFFKQWTSKYIVIEDPFDLNHNLGAGLSRKMNTNFMKAFINGRRVFGIPVKGF PKDYPSKMEYFFDPDVL  
TEGELAPNDRCCRICGKIGHFMKDCPMRRKVRRRRDQEDALNORYPENKEKRSKEDKEIHNKYTEREVSTKEDKPIQCTPOKAKPMRAA  
ADLGREKILRPPVEKWKRRQDDKDLREKRCFICGREGHIKKECPQFKGSSGSLSSKYMT  
QGKASAKRTQOES

**XRN2; 1 CX<sub>2</sub>CX<sub>3</sub>GHX<sub>4</sub>C**

MGVPAFFRWLSRKYPSIIVNCVEEKPEKCNVGIKIPVDASKPNNDVEFDNLYLDMNGI IHPCTHPEDKPAPKNEDEMMVAIFEYIDRLF  
SIVRPRLLYMAIDGVAPRAKMNQORSRRFRASKEGMEAAVEKQVRVEEILAKGGFLPPEEIKERFDSNCTIPGTEFMDNLAKCLRYI  
ADRLNNDPGWKNLTVILSDASAPGEGEHKIMDYIRRQRAQPNHDPNTHHCLCGADADLIMLGLATHEPNFTI IREEFKPNKPKPCGLCN  
QFGHEVKDCGELPREKKGKHELDLADSLPCAEGEFLRLNLVREYLERELTMASLPFTFDVERSIDDWVFCFFVGNDFLPHLPSLEIR  
ENAIDRLVNIYKNVVKHTGGYLTESGYVNLQVRQMIMLAVGEVDSIFKRRKDEDSFRRRQKEKRKRMRDQPAFTPSGILTPHALGS  
RNSPGSQVASNPRQAAAYEMRMQNNSSPSPSISNTSFTSDGSPSPLGGIKRKAEDSDSEPEPEDNVRLEWAGWKQRYKKNKFDVDADEKF  
RRKVVQSYVEGLCWVLRYYYYQCASWKWYYPFHYAPFASDFEGIADMPDFEKGTKPFKPLEQLMGVFPAAAGNLFPPSWRKLMSDPS  
SIDFYPEDFAIDLNGKKYAWQGVALLPFVDERRLRAALEEYVPLTPEETRRNSLGGDVLVFGKHHPLHDFILELYQTGSTPEVVEVP  
ELCHGIQKGFSLDEEAILPDQIVCSVPMLRDLTQNTVYSINFDPQFAEDYIFKAVMLPGARKPAAVLKPDSWEKSSNGRQWKPQLGF  
NRDRRPVHLDQAAFRTLGHVMPRGSGTGIYSNAAPPVYQGNLYRPLLRGQAQIPKLSNMMPQDSWRGPPPLFQQQRFDRGVGAEPL  
LPWNRMLQTONAAFPQPNYQMLAGPGGYPPRRDRRGGRYPREGRKYPLPPSPGRYNN

**ZCRB1/ZCCHC19/(U11/U12-31K); 1 CX<sub>2</sub>CX<sub>3</sub>GHX<sub>4</sub>C**

MSGGLAPSKSTVYVSNLFPFLTNNDLYRIFFSKYGKVVKVTIMKDKDTRKSKGVAFILFLDKDSAQNCTRAINNKQLFGRVIKASIAIDN  
GRAAEFIRRRNYFDKSKCYECGEGSGHLSYACPKNMLGEREPKKKKEKKKKKAPEPEEEIEEVEESEDEGEDPALDLSQAIAFQOAKI  
EEEQKKWKPPSSGVPSTSDSDRRPRIKKSTYFSDEEELSD

**ZCCHC2; 1 CX<sub>2</sub>CX<sub>3</sub>GHX<sub>4</sub>C**

MLRMKLPKPTHPEAEPPPEAEPEADARPGAKAPSRRRRDCRPPPPPPPPAGPSRGLPLPPPPPPRGLGPPVAGGAAAGAMPGGGGGPPS  
AALREQERVYEWFLVGLGSAQRLEFMCGLLDLCNPLELRFGLSCLLEDLARKDYHYLRDSEAKANGLSDPGPLADFREPAVRSRLIVYLA  
LLGSENREAAAGRLHRLLPQVDVSVLKSRAARGEGSRGGAEDERGEDGDGEQDAEKDGSPEGGIVEPRVGGGLSRAQEELLLLFTMAS  
LHPAFSFGHQRVTLREHLERLRAALRGGPEDAEVEVEPCKFAGPRAQNNNSAHGDMQNNESSLIEQAPIPDGLTVAPHRAQREAVHIEK  
IMLKGVQRKRADKYWEYTFKVNWSDLSVTTVTKTHQELQEFLLKLPKELSSSETFDKTIILRALNQSLKREERRHPDLEPILRQLFSSSS  
QAFLOSQKVHSSFQSSISSDLSHSINNLOSSLKTSKILEHLKEDSSEASSQEEDVLQHAIIHKHTGKSPIVNNIGTSCSPLDGLTMQYS  
EQNGIVDRKQSCCTTIQHPEHCVTADQHSAEKRSLSINKKKKPKQTEKEKIKKTDNRLNSRINGIRLSTPQHAHGGTVKDVNLDIGS  
GHDTCGETSSESYSPPSPRHDGRESFESEEEKDRDSDNSNEDSGNPSTTRFTGYGSVNQTVTVKPPVQIASLGNENGNLLEDPLNSPK  
YQHSFMPPTLHCVMHNGAQKSEVVVPAPKPADGKTI GMLVPSVAISAIRESANSTPVGILGPTACTGESEKHELLELASPLPIPSTFLP  
HSSTPALHLTVQRKLPPQGSSECTVNI PQPPGSLSIASNTAFIPIHNPFSFPGSPVATTD PITKSASQVVLNQMVPPQIEGNTG  
TVPQPTNVKVVLPAAGLSAAQPASYPPLPGSPLAAGVLPSONSSVLSTAATSPQASAGISQAQATVPPAVPTHTPGPAPSPSPALTHS  
TAQSDSTSYISAVGNTNANGTVVPPQMGSGPCGSCGRRSCGTNGNLQNSYYYPNPMPGPMYRVPSFFTLPSICNGSYLNQAHQSNQ  
NQLPFFLPQTPYANGLVHDPVMSQANYGMQMGAGFRFPVYPAPNVVANTSGSGPKKNGVSCYNCGVSGHYAQDCQKSSMEANQQG  
TYRLRYAPPLPPSNDTLDSD

**ZCCHC3; 1 CX<sub>2</sub>CX<sub>4</sub>HX<sub>4</sub>C and 2 CX<sub>2</sub>CX<sub>3</sub>GHX<sub>4</sub>C**

MATGGGAEERKRGRPQLLPARPAARGEEADGGREKMGWAQVVKNALEKKGFEFRPPPPREESGGGGGSAGLGGPAGLAAPDLGDF  
PPAGRDPKGRRRDPAGEAVDPRKKKGAAEAGRRKKAEEAAAAMATPARPGEAEDAERPLQDEPAAAAAGPGKGRFLVIRICFQGDGA  
CPTRDFVVGALILRSIGMDPSDIYAVIQIPGSRFEDVFSRSAEKALFLRVYEEKREQEDCWENFVVLGRSKSSSLKTLFILFRNETVDV  
EDIVTWLKRHCVDLAVPVKVTDRFGIWTGEYKCEIELRQEGGVRHLPGAFFLGAERGYSWYKQPKTCFKCGSRTHMSGCTQDRCFR  
CGEEGHLSPYCRKGIVCNLCGKRGHAFACPKAVHNSVAAQLTGAVAGH

**ZCCHC9; 2 CX<sub>2</sub>CX<sub>4</sub>HX<sub>4</sub>C and 2 CX<sub>2</sub>CX<sub>3</sub>GHX<sub>4</sub>C**

MTRWARVSTTYNKRPLPATSWEDMKKGSFEGTSQNLPRKRQLEANRLSLKNDAPQAKHKKKKKEYLNEDVNGFMEYLRQNSQMVHNG  
QIIATDSEEVREEIAVALKKDSRREGRRKRQAAKKNAMVCFHCRKPGHGIADCPAALENQDMGTGICYRCGSTHEHITKCKAKVDPAL  
GEFPFAKCFVCGEMGHLRSRCPDNPKGLYADGGGCKLCSVEHLKDCPESQNSERMVTVGRWAKGMSADYEEILDVPKPKPKTKIPK  
VVNF

**ZCCHC10; 1 CX<sub>2</sub>CX<sub>3</sub>GHX<sub>4</sub>C**

MATPMHRLIARRQAFDTELQPVKTFWILIQPSIVISEANKQHVRCQKCLEFGHWTYECTGKRKYLHRPSRTAELKKALKEKENRLLLQO  
SIGETNVERKAKKRSKSVTSSSSSSSDSSASDSSSESEETSTSSSSSEDSDTDESSSSSSSSASSTSSSSSDSDSSSSSSSSSTSD  
SSSDDEPPKKKKK

**ZCCHC13; 4 CX<sub>2</sub>CX<sub>3</sub>GHX<sub>4</sub>C**

MSSKDFACGHSGHWARGCPRGGAGRRGGGHRGSGQCGSTTLSYTCYCCGESGRNAKNCVLLGNTCYNCGRSGHIAKDCKDPKRERRQ  
HCYTCGRGLGLLARDCDRQEKQKCYSCGKLGHIQKDCAOVKCYRCEIGHVAINCSKARPGQLLPLRQIPTSSQGMSQ

**ZCCHC14; 1 CX<sub>2</sub>CX<sub>3</sub>GHX<sub>4</sub>C**

MASNHPAFSFGHQVLRQELTQIQSSLNNGGGHGGKAPGPGGALPTCPACHKITPRTEAPVSSVNSLENALHTSAHSTEEESLPKRPL  
GKHSKVSVEKIDLKGLSHTKNDNRNVECSFEVLWSDSSITSVTKSSSEVTEFISKLCQLYPEENLEKLIPLCLAGPDAFYVERNVDLDSG  
LRYLASLPSHVLKNDHVRRLSTSSPPQQLQSPSPGNPSLSKVGTVMGVSGRPVCGVAGIPSSQSGAQHHGQHPAGSAAPLPHCSHAGS  
AGSALAYRTQMDTSPAILMPSLQTPQTQEQNGILDWLRKLRHLKYYPVFKQLSMEKFLSLTEEDLNKFESLTMGAKKLLKTQLELEKE  
KSERRCLNPSAPPLVTSSGVARVPPTSHVGPVQSGRGSAAELRVEVEQPHHQLPREGSSSEYSSSSSSPMGVQAREESSDSAEENDRR  
VEIHLESDDKEKPVMLLNHFTSSSARPTAQVLPVQNEASSNPSGHHPLPPQMLSAASHITPIRMLNSVHKPERGSADMKLLSSSVHSL  
SLEERNKSGSPRSSMKVDKSFSGAMMDVLPASAPHQPQVLSGLSESSMSPTVSFGPRTKVHASTLDRVLKTAQQPALVETSTAAT  
GTPSTVLHAARPPIKLLSSSVPADSAISGQTS CPNNVQISVPPAI INPRTALYTANTKVAFSAMSSMPVGLQGGFCANSNTASPSH  
PSTSFANMATLPCPAPSSPALSSVPESFFYSSSGGGGSTGNI PASNPNHHHHHHHQOPPAPPQAPPPPQIVCTSCGCSGCSGSSG  
LTVSYANYFQHPFSGPSVFTFPFLPFSPMCSSGYVSAQQYGGGSTFPVVHAPYSSSGTDPVLSGQSTFAVPPMQNFMAGTAGVYQTQG  
LVGSSNGSSHKSGNLS CYNCGATGHERAQDCRQPSMDFNRPGTFRKLYAPPAESLSDTD

**ZCCHC24; 1 CX<sub>2</sub>CX<sub>3</sub>GHX<sub>4</sub>C**

MSLLSAIDTSAASVYQPAQLLNWVYLSLQDTHQASAFDAFRPEPTAGAAPPPELAFGKGRPEQLGSPHSSYLNSFFQLQRGEALSNSVY  
KGASPYGSLNNIADGLSSLTEHFDLTLTSEARKPSKRPPPNYLCHLFCFNKGHYIKDCPOARPKGEGLTPYQGGKRCFGEYKCPKCRK  
WMSGNSWANMGQECIKCHINVYPHKQRPLEKPDGLDVSQSKHEPQHLCEKCKVLGYCRRVQ

**PEG10; 1 CX<sub>2</sub>CX<sub>3</sub>GHX<sub>4</sub>C**

MTERRRDELSEINNLRKVMKQSEENNNLQSQVQKLTEENTTLREQVEPTPEDEDDDIELRGAAAAAPPPIEECPEDLPEKFDGN  
PDMLAPFMAQCQIFMEKSTRDFSVDRVRVCFVTSMTGRAARWASAKLERSHYLMHNYPAFMMEMKHVFEDPQRREVAKRKIRRLRQGM  
GSVIDYSNAFQMAQDLWNEPALIDQYHEGLSDHIQEELSHLEVAKLSALIGQCIIHERRLAAAAARKPRSPRALVLPHIASHHQ

VDPTEPVGGARMRLTQEEKERRRKLNL**CLYCGTGGHYADNC**PAKASKSSPAGKLPGPAVEGSPSATGPEIIRSPQDDASSPHLQVMLQIH  
LPGRHTLFVRAMIDSGASGNFIDHEYVAQNGIPLRIKDWPIVLAIDGRPIASGPVVHETHDLIVDLGDHREVLSFDVTSQSPFFPVVLG  
VRWLSTHDPNITWSTRSIVFDSEYCRYHCRMYSPIPPSLPPPAPQFPFLYYPVDGYRVYQPVRYYYVQNVYTPVDEHVYPDHRVDPHIE  
MYPGAHSIPSGHVYSLSEPEMAALRDFVARNVKDLITPTIAPNGAQVLQVKGWKLQVSYDCRAPNNFTIQNQYPRLSIPNLEDQAHL  
ATYTEFVQPIPGYQTYPTYAAYPTYPVGFVAVYVGRDQGGRSLYVPMITWNPWHYRQPPVQYPPFPQPPPPPPPPPPPSYSTL

**RTL3/ZCCHC5; 1 CX<sub>2</sub>CX<sub>3</sub>GHX<sub>4</sub>C**

MVEDLAASYIVLKLENEIRQAQVQWLMEENAAIQAQIPELQKSQAKEYDLLRKSSEAKEPQKLEPHMNPAAWEAQKTEFKEPQKPP  
EPQDLLPWEPPAAWELQEAPAPESLAPPATRESQKPPMAHEIPTVLEGQGPANTQDATIAQEPKNSEPQDPPNIEKPOEAPEYQETA  
QLEFLELPPQEPLEPSNAQEFLELSAAQESLEGLIVVETSAASEFPQAPIGLEATDFPLQYTLTFSGDSQKLEPFLVQLYSYMRVRGH  
LYPTEAALVSFVGNCFSGRAGWWFQLLLDIQSPLLEQCESFIPVLQDTFDNPNEMKNDANQCIHQLCQGEQGHVATHFHLLIAQELNDEST  
LWIQFQEGCLASSIQDELSHTSPATNLSDLITQCISLEEKDPDNPGLGKSSSAEGDGPESPPAENQPMQAAINCPHISEAEWVRWHKGR**LC**  
**LYCGYPGHFARDCPVKPHQALQAGNIQACQ**

**RTL4/ZCCHC16; 1 CX<sub>2</sub>CX<sub>3</sub>GHX<sub>4</sub>C**

MEKCTKSSSTMQVEPSFLQAENLILRLQMHPHTTENTAKRGQVMPALATTVMVPVYSLEHLTQFHGDPA NCSEFLTQVTTYLTALQISN  
PANDAQIKLFDYLSQOLESCGIIISGPKSTLLKQYENLILEFQQSFGKPTKQEIINPLMNAKFDKGNSSQODPATFHLAQNLI CNET  
NQSGQFEKALADPNQDEESVTDMDNLPDLITQCIIQLDKKHSRPELLQSETQLPLLASLIQHQALFSPTDPPPKKGP IQLREGQLPLT  
PAKRARQOETQI**CLYCSQSGHFTRDC**LAKRSRAPATTNNTAHQ

**PNMA3; 1 CX<sub>2</sub>CX<sub>3</sub>GHX<sub>4</sub>C**

MPLTLLQDWCRCGEHLNTRRCMLIIGIPEDCGEDEFEEETLQEACRHLGRYRVIGRMFRREENAQAILLELAQDIDYALLPREIPGKGGPW  
EVIVKPRNSDGEFLNRLNRFLEERRTVSDMNRVLGSDTNC SAPRVTISPEFWTWAQTLGAAVQPLEQMLYRELRVFSGNTISIPGAL  
AFDAWLEHTTEMLQMWQVPEGEKRRRLMECLRGPALQVVSGLRASNASITVEECLAALQVFGPVE SHKIAQVKLCKAYQEAGEKVS SF  
VLRLEPLLQRAVENNVVSRNVNQTRLKRVLSGATLPDKLRDKLKLKMQRRKPPGFLALVKLLREEEWEATLGPDPRESLEGLEVAPRP  
PARITGVGAVPLPASGNSFDVVRPSQGYRRRRGRGQHRGGVARAGSRGSRKRKRHTF**CYSCGEDGHIRVQC**INPSNLLLVKQKKQAAVE  
SGNGNWAWDKSHPKSKAK

**PNMA7A/ZCCHC12/SIZN1; 1 CX<sub>2</sub>CX<sub>3</sub>GHX<sub>4</sub>C**

MASIIARVGNRRRLNAPLPPWAHSMLRSLGRSLGPIIMASMDRNMKLFSGRVVPAQGEETFENWLTQVNGVLPDWNMSEEEKL KRLMKT  
LRGPAREVMRVLQATNPNSVADFLRAMKLVFGESESSVTAHGKFFNTLQAQGEKASLYVIRLEVQLQNAIQAGIIAEKDANRTRLQQL  
LLGGELSRDLRLRLKDFLRMYANEQERLPNFLELIRMVREEDWDDAFIKRKRPKRSESMVERAVSPVAFQGSPP IIVIGSADCNVIEID  
DTLDDSDDEDVILVESQDPPLPSWGAPPLRDRARPQDEVLVIDSPHNSRAQFPSTSGSGYKNGPGEMRRARKRKHTR**CSYCGEEGHS**  
**KETCDNESDKAQVFENLIITLQELTHTEMERSRVAPGEYNDFSEPL**

**PNMA7B/ZCCHC18; 1 CX<sub>2</sub>CX<sub>3</sub>GHX<sub>4</sub>C**

MASITACVGNRRQONAPLPPWAHSMLRSLGRSLCPLVVKMAERNMKLFSGRVVPAQGKETFENWLIQVNEVLPDWSMSEEEKL KRLMKT  
LRGPAREVMRLLQAANPNLSVADFLRAMKLVFGESESSVTAHGKFFNTLQAQGEKASLYVIRLEVQLQNAIQAGIIAEKDANQTRLQQL  
LLGAELNRDLRFLRKLHLLRMYANKQERLPNFLELIKMIREEEDWDDAFIKRKRPKRSEPI MERAASPVAFQGAQPIAISADCNCNVIE  
IDDTLDDSDDEDVILVVSLSYPSLPTPTGAPPFRGRARPLDQVLVIDSPNNSGAQSLSTSGSGYKNDGPGNIRRARKRKYTT**CSYCGEEG**  
**HKETCDNESNKAQVFENLIITLQELTHTEERSKEVPGEHSDASEPQ**

**Supplementary Figure 3.** Human ZCCHC domain-containing proteins. The number of CX<sub>2</sub>CX<sub>4</sub>HX<sub>4</sub>C or CX<sub>2</sub>CX<sub>3</sub>GHX<sub>4</sub>C sequences in each protein is shown; these sequences have been highlighted. A slash separates alternative names given by different authors to the same protein.



Supplementary Figure 4. Amino acid frequencies in ZCCHC domains.

| Position                        | Amino acid |    |     |    |    |    |     |     |    |    |    |    |    |    |    |    |    |    |    |   |
|---------------------------------|------------|----|-----|----|----|----|-----|-----|----|----|----|----|----|----|----|----|----|----|----|---|
|                                 | A          | C  | D   | E  | F  | G  | H   | I   | K  | L  | M  | N  | P  | Q  | R  | S  | T  | V  | W  | Y |
| <i>Saccharomyces cerevisiae</i> | 1          | 0  | 0   | 0  | 0  | 0  | 0   | 4   | 2  | 1  | 0  | 0  | 2  | 2  | 3  | 1  | 0  | 4  | 0  | 1 |
|                                 | 2          | 1  | 0   | 0  | 0  | 3  | 0   | 0   | 1  | 3  | 2  | 1  | 0  | 1  | 3  | 1  | 1  | 0  | 1  | 1 |
|                                 | 3          | 0  | 20  | 0  | 0  | 0  | 0   | 0   | 0  | 0  | 0  | 0  | 0  | 0  | 0  | 0  | 0  | 0  | 0  | 0 |
|                                 | 4          | 0  | 0   | 0  | 1  | 1  | 0   | 0   | 0  | 1  | 0  | 0  | 2  | 1  | 0  | 1  | 1  | 3  | 0  | 0 |
|                                 | 5          | 0  | 0   | 0  | 0  | 0  | 0   | 1   | 2  | 2  | 2  | 0  | 10 | 0  | 0  | 1  | 0  | 1  | 1  | 0 |
|                                 | 6          | 0  | 20  | 0  | 0  | 0  | 0   | 0   | 0  | 0  | 0  | 0  | 0  | 0  | 0  | 0  | 0  | 0  | 0  | 0 |
|                                 | 7          | 0  | 0   | 2  | 0  | 0  | 10  | 0   | 0  | 1  | 0  | 0  | 5  | 0  | 0  | 0  | 2  | 0  | 0  | 0 |
|                                 | 8          | 1  | 0   | 0  | 4  | 0  | 3   | 0   | 0  | 2  | 1  | 0  | 1  | 0  | 5  | 0  | 2  | 1  | 0  | 0 |
|                                 | 9          | 3  | 0   | 0  | 0  | 0  | 0   | 0   | 1  | 4  | 0  | 1  | 1  | 2  | 0  | 3  | 0  | 4  | 1  | 0 |
|                                 | 10         | 0  | 0   | 2  | 0  | 0  | 15  | 0   | 0  | 1  | 0  | 0  | 1  | 0  | 0  | 1  | 0  | 0  | 0  | 0 |
|                                 | 11         | 0  | 0   | 0  | 0  | 0  | 0   | 20  | 0  | 0  | 0  | 0  | 0  | 0  | 0  | 0  | 0  | 0  | 0  | 0 |
|                                 | 12         | 0  | 0   | 0  | 0  | 3  | 0   | 0   | 2  | 2  | 3  | 2  | 1  | 0  | 0  | 0  | 2  | 0  | 2  | 1 |
|                                 | 13         | 2  | 0   | 0  | 1  | 0  | 2   | 0   | 1  | 4  | 0  | 0  | 0  | 0  | 1  | 4  | 4  | 1  | 0  | 0 |
|                                 | 14         | 1  | 0   | 2  | 3  | 0  | 0   | 0   | 0  | 5  | 0  | 0  | 0  | 0  | 0  | 4  | 3  | 1  | 0  | 0 |
|                                 | 15         | 0  | 0   | 11 | 3  | 0  | 0   | 0   | 0  | 0  | 0  | 0  | 2  | 0  | 2  | 2  | 0  | 0  | 0  | 0 |
|                                 | 16         | 0  | 20  | 0  | 0  | 0  | 0   | 0   | 0  | 0  | 0  | 0  | 0  | 0  | 0  | 0  | 0  | 0  | 0  | 0 |
|                                 | 17         | 1  | 0   | 1  | 0  | 0  | 0   | 0   | 0  | 1  | 0  | 2  | 1  | 11 | 1  | 0  | 0  | 2  | 0  | 0 |
|                                 | 18         | 0  | 0   | 0  | 4  | 0  | 0   | 5   | 0  | 2  | 0  | 1  | 2  | 0  | 0  | 0  | 4  | 1  | 1  | 0 |
| <i>Homo sapiens</i>             | 1          | 3  | 0   | 6  | 0  | 0  | 3   | 1   | 4  | 6  | 2  | 1  | 3  | 2  | 5  | 3  | 4  | 7  | 0  |   |
|                                 | 2          | 2  | 3   | 0  | 1  | 1  | 6   | 2   | 4  | 8  | 4  | 0  | 1  | 1  | 10 | 2  | 4  | 5  | 0  |   |
|                                 | 3          | 0  | 57  | 0  | 0  | 0  | 0   | 0   | 0  | 0  | 0  | 0  | 0  | 0  | 0  | 0  | 0  | 0  | 0  |   |
|                                 | 4          | 1  | 0   | 1  | 2  | 11 | 1   | 3   | 0  | 3  | 3  | 0  | 1  | 0  | 1  | 3  | 4  | 1  | 0  |   |
|                                 | 5          | 0  | 0   | 0  | 2  | 2  | 0   | 2   | 6  | 7  | 6  | 0  | 10 | 0  | 10 | 3  | 1  | 2  | 0  |   |
|                                 | 6          | 0  | 57  | 0  | 0  | 0  | 0   | 0   | 0  | 0  | 0  | 0  | 0  | 0  | 0  | 0  | 0  | 0  | 0  |   |
|                                 | 7          | 1  | 0   | 1  | 1  | 1  | 43  | 1   | 0  | 2  | 1  | 0  | 1  | 0  | 2  | 1  | 2  | 0  | 0  |   |
|                                 | 8          | 2  | 1   | 1  | 15 | 0  | 4   | 0   | 0  | 11 | 0  | 2  | 1  | 0  | 3  | 7  | 6  | 1  | 0  |   |
|                                 | 9          | 2  | 0   | 2  | 8  | 4  | 2   | 0   | 5  | 5  | 7  | 2  | 0  | 5  | 0  | 4  | 7  | 3  | 0  |   |
|                                 | 10         | 0  | 0   | 3  | 3  | 0  | 47  | 0   | 0  | 0  | 0  | 1  | 0  | 0  | 0  | 0  | 1  | 2  | 0  |   |
|                                 | 11         | 0  | 0   | 0  | 0  | 0  | 0   | 57  | 0  | 0  | 0  | 0  | 0  | 0  | 0  | 0  | 0  | 0  | 0  |   |
|                                 | 12         | 1  | 0   | 0  | 2  | 4  | 1   | 2   | 7  | 2  | 12 | 3  | 0  | 0  | 1  | 2  | 3  | 0  | 3  |   |
|                                 | 13         | 20 | 0   | 0  | 0  | 1  | 1   | 0   | 5  | 7  | 1  | 3  | 0  | 0  | 2  | 3  | 7  | 4  | 3  |   |
|                                 | 14         | 4  | 0   | 2  | 2  | 1  | 1   | 1   | 2  | 21 | 0  | 0  | 2  | 1  | 2  | 8  | 2  | 3  | 0  |   |
|                                 | 15         | 2  | 0   | 25 | 11 | 0  | 0   | 0   | 0  | 1  | 0  | 0  | 7  | 0  | 2  | 1  | 4  | 3  | 0  |   |
|                                 | 16         | 0  | 57  | 0  | 0  | 0  | 0   | 0   | 0  | 0  | 0  | 0  | 0  | 0  | 0  | 0  | 0  | 0  | 0  |   |
|                                 | 17         | 1  | 0   | 5  | 1  | 2  | 0   | 1   | 1  | 7  | 1  | 0  | 1  | 26 | 0  | 2  | 3  | 6  | 0  |   |
|                                 | 18         | 5  | 0   | 3  | 8  | 1  | 2   | 2   | 2  | 9  | 5  | 3  | 5  | 0  | 6  | 2  | 0  | 2  | 0  |   |
| <i>Arabidopsis thaliana</i>     | 1          | 6  | 0   | 5  | 6  | 2  | 21  | 2   | 4  | 13 | 6  | 1  | 9  | 6  | 0  | 17 | 10 | 5  | 0  |   |
|                                 | 2          | 8  | 1   | 7  | 5  | 5  | 11  | 0   | 9  | 14 | 7  | 0  | 3  | 6  | 1  | 12 | 14 | 6  | 0  |   |
|                                 | 3          | 0  | 121 | 0  | 0  | 0  | 0   | 0   | 0  | 0  | 0  | 0  | 0  | 0  | 0  | 0  | 0  | 0  | 0  |   |
|                                 | 4          | 2  | 0   | 1  | 3  | 30 | 3   | 5   | 3  | 6  | 4  | 0  | 6  | 0  | 3  | 2  | 7  | 3  | 0  |   |
|                                 | 5          | 0  | 1   | 0  | 10 | 2  | 1   | 6   | 15 | 16 | 4  | 2  | 24 | 0  | 3  | 14 | 10 | 4  | 5  |   |
|                                 | 6          | 0  | 121 | 0  | 0  | 0  | 0   | 0   | 0  | 0  | 0  | 0  | 0  | 0  | 0  | 0  | 0  | 0  | 0  |   |
|                                 | 7          | 1  | 2   | 0  | 1  | 4  | 87  | 2   | 0  | 9  | 0  | 0  | 4  | 0  | 1  | 6  | 4  | 0  | 0  |   |
|                                 | 8          | 4  | 0   | 10 | 24 | 0  | 18  | 4   | 3  | 15 | 1  | 3  | 3  | 0  | 13 | 12 | 6  | 1  | 0  |   |
|                                 | 9          | 3  | 0   | 3  | 10 | 4  | 1   | 0   | 1  | 9  | 13 | 7  | 4  | 14 | 4  | 6  | 12 | 9  | 0  |   |
|                                 | 10         | 1  | 0   | 4  | 2  | 0  | 98  | 0   | 0  | 0  | 0  | 0  | 2  | 0  | 0  | 1  | 6  | 7  | 0  |   |
|                                 | 11         | 0  | 0   | 0  | 0  | 0  | 0   | 121 | 0  | 0  | 0  | 0  | 0  | 0  | 0  | 0  | 0  | 0  | 0  |   |
|                                 | 12         | 1  | 1   | 5  | 0  | 23 | 2   | 1   | 14 | 1  | 15 | 6  | 8  | 3  | 1  | 10 | 6  | 4  | 6  |   |
|                                 | 13         | 58 | 1   | 0  | 3  | 1  | 2   | 0   | 6  | 0  | 5  | 2  | 0  | 1  | 1  | 4  | 23 | 8  | 6  |   |
|                                 | 14         | 6  | 0   | 0  | 1  | 2  | 1   | 3   | 2  | 18 | 3  | 4  | 5  | 1  | 4  | 51 | 10 | 5  | 0  |   |
|                                 | 15         | 10 | 0   | 40 | 19 | 0  | 2   | 6   | 1  | 1  | 3  | 0  | 12 | 0  | 5  | 3  | 4  | 9  | 0  |   |
|                                 | 16         | 0  | 121 | 0  | 0  | 0  | 0   | 0   | 0  | 0  | 0  | 0  | 0  | 0  | 0  | 0  | 0  | 0  | 0  |   |
|                                 | 17         | 2  | 0   | 3  | 2  | 1  | 3   | 3   | 0  | 5  | 7  | 4  | 0  | 53 | 1  | 9  | 10 | 16 | 1  |   |
|                                 | 18         | 4  | 0   | 5  | 7  | 2  | 10  | 1   | 5  | 10 | 2  | 0  | 21 | 0  | 6  | 8  | 18 | 9  | 0  |   |
| All together                    | 1          | 9  | 0   | 11 | 6  | 2  | 24  | 3   | 12 | 21 | 9  | 2  | 12 | 10 | 7  | 25 | 14 | 9  | 0  |   |
|                                 | 2          | 11 | 4   | 7  | 6  | 9  | 17  | 2   | 14 | 25 | 13 | 1  | 4  | 8  | 5  | 23 | 17 | 10 | 0  |   |
|                                 | 3          | 0  | 198 | 0  | 0  | 0  | 0   | 0   | 0  | 0  | 0  | 0  | 0  | 0  | 0  | 0  | 0  | 0  | 0  |   |
|                                 | 4          | 3  | 0   | 2  | 6  | 42 | 4   | 8   | 3  | 10 | 7  | 0  | 9  | 1  | 4  | 6  | 12 | 7  | 0  |   |
|                                 | 5          | 0  | 1   | 0  | 12 | 4  | 1   | 9   | 23 | 25 | 12 | 2  | 44 | 0  | 3  | 25 | 13 | 6  | 0  |   |
|                                 | 6          | 0  | 198 | 0  | 0  | 0  | 0   | 0   | 0  | 0  | 0  | 0  | 0  | 0  | 0  | 0  | 0  | 0  | 0  |   |
|                                 | 7          | 2  | 2   | 3  | 2  | 5  | 140 | 3   | 0  | 12 | 1  | 0  | 10 | 0  | 3  | 7  | 8  | 0  | 0  |   |
|                                 | 8          | 7  | 1   | 11 | 43 | 0  | 25  | 4   | 3  | 28 | 2  | 5  | 5  | 0  | 21 | 19 | 14 | 3  | 0  |   |
|                                 | 9          | 8  | 0   | 5  | 18 | 8  | 3   | 0   | 7  | 18 | 20 | 10 | 5  | 21 | 4  | 13 | 19 | 16 | 0  |   |
|                                 | 10         | 1  | 0   | 9  | 5  | 0  | 160 | 0   | 0  | 1  | 0  | 1  | 3  | 0  | 0  | 2  | 7  | 9  | 0  |   |
|                                 | 11         | 0  | 0   | 0  | 0  | 0  | 0   | 198 | 0  | 0  | 0  | 0  | 0  | 0  | 0  | 0  | 0  | 0  | 0  |   |
|                                 | 12         | 2  | 1   | 5  | 2  | 30 | 3   | 3   | 23 | 5  | 30 | 11 | 9  | 3  | 2  | 12 | 11 | 4  | 11 |   |
|                                 | 13         | 80 | 1   | 0  | 4  | 2  | 5   | 0   | 12 | 11 | 6  | 5  | 0  | 1  | 4  | 11 | 34 | 13 | 9  |   |
|                                 | 14         | 11 | 0   | 4  | 6  | 3  | 2   | 4   | 4  | 44 | 3  | 4  | 7  | 2  | 6  | 63 | 15 | 9  | 0  |   |
|                                 | 15         | 12 | 0   | 76 | 33 | 0  | 2   | 6   | 1  | 2  | 3  | 0  | 21 | 0  | 9  | 6  | 8  | 12 | 0  |   |
|                                 | 16         | 0  | 198 | 0  | 0  | 0  | 0   | 0   | 0  | 0  | 0  | 0  | 0  | 0  | 0  | 0  | 0  | 0  | 0  |   |
|                                 | 17         | 4  | 0   | 9  | 3  | 3  | 3   | 4   | 1  | 13 | 8  | 6  | 2  | 90 | 2  | 11 | 13 | 24 | 1  |   |
|                                 | 18         | 9  | 0   | 8  | 19 | 3  | 12  | 8   | 7  | 21 | 7  | 4  | 28 | 0  | 12 | 10 | 22 | 12 | 6  |   |

Values indicate the number of cases in which each amino acid is present in a given position (from the first to the eightieth; 1-18 in the column headed as "Position") within 20 ZCCH domains from 7 yeast factors, 57 from 34 human factors, and 121 from 69 Arabidopsis factors. Numbers are also shown for all the 198 sequences from the 110 factors taken together. Transposon-derived and uncertain ZCCH domains have been omitted from the analysis. The C and H residues that characterize the ZCCH domain are highlighted in red, the highly conserved G at the seventh and tenth positions in green, and residues occupying positions with a frequency higher than 30% in blue.
